# Supplementary material for: Nocturnal boundary layer turbulence regimes analysis during the BLLAST campaign
Source: Copernicus journal article supplement (doi:10.5194/acp-2018-1300), 2019-03-01
Supplement: Supplementary file [file acp-2018-1300-AC1-supplement.pdf]

## **Answer to “Interactive comment on “Nocturnal boundary layer turbulence regimes analysis during the BLLAST campaign” by Yus-Díez et al.” by anonymous #referee 1.**

This document answers the questions posed and the point of view on several aspects of the paper herein discussed. We would like to acknowledge the valuable comments by the referee.

### **General comments.**

**1) A point that is not developed either discussed in the paper is the importance of the height of the Low Level Jet (LLJ) for the different events analysed in the work. Depending if you are analysing levels above or below the LLJ the behaviour of the turbulence transport can be different showing if turbulence is connected or not with surface, or if MOST can be used (see for example Grachev et al., 2016). This issue could be connected to the different regimes that are found using the HOST theory and it can be interesting to explore it.**

Response: Thank you for your comments and suggestions. We try to answer your requirements using the previous work done by different authors. Nilsson et al., (2014) analyzed the wind profile using data from the Skinfoflow tower during 10 IOP nights, showing that all of them, except one, displayed reverse wind gradient or non-monotonic wind profile with wind direction from about 120 to 180 degrees. This result as Román-Cascón et al., (2015) indicated corresponds to shallow drainage flows SDFs exhibiting a wind maximum around  $1.5\text{-}2\text{ ms}^{-1}$  close to the surface at 2-3 m a.g.l., and also a larger scale down slope wind coming from the south and channeled through the valleys where Pyrenees mountain range is located. The maximum of this larger scale thermal wind is around 80 m a.g.l., as results of WRF simulations (Román-Cascón et al., 2015). In addition, the organization of the flow in the Aura Valley as Jimenez et al., (2019) indicate generates a valley exit jet close to the midnight, which propagates through the foothills while its characteristics (speed and height) decrease. A maximum wind speed of about  $5\text{-}10\text{ ms}^{-1}$  from the southern sector is found in Lannemezan between 50 and 200 m above the ground, depending on the features of the mesoscale winds (Jiménez et al., 2019).

All low-level jets considered above can be related to the three turbulent regimes. In this way, as Sun et al., (2012) stated we can consider two possibilities:

- a) The maximum wind of a LLJ is less than the threshold value for its height above the ground, but the local shear below the LLJ is considerable, then moderate turbulence can be generated, diffusing downwards, especially when the vertical temperature gradient decreases with height, this situation corresponds to the turbulence regime 3.
- b) The maximum wind of a LLJ is greater than the threshold value for its height above the ground. This case corresponds to the turbulence regime 2.

In addition to other factors, also the occurrence of the different regimes can be linked to the presence of LLJs.

This answer is included in several of the paragraphs of the new Sect. 3, between pages 6-9.

**2) When it is said that more than 60% of the flows at nIOPs come from SE quadrant and correspond to shallow drainage flows (SDF), did you test that they are really SDF? How shallow? What is the height of the LLJ found? I think that you should analyse this issue in a deeper way.**

Response: This comment allowed us to identify that there was a mistake so the sentence is re-written. Fig 3 shows that a 25% of the flows at the lower levels (Skinflow tower) come from the southeast quadrant, which correspond to shallow drainage flows, formed after sunset due to local small slopes located in the foothills of the Pyrenees (Román-Cascón et al., 2015). These authors tested that up to 4 days of the BLLAST campaign present SDFs after the near calm period of the afternoon, exhibiting a wind maxima, around  $1.5\text{-}2\text{ ms}^{-1}$  close to the surface, in the first 5 m a.g.l. At higher levels of the Valimev tower wind roses show a large fraction of winds coming from the southeast quadrant (35 % of the data), which are associated to the larger scale mountain plain circulation. The maximum of this thermal wind is located around 80 m a.g.l. as a result of WRF simulations indicated by Roman-Cascon et al., 2015. In addition, as reported by Jimenez et al. (2019), the organization of the flow in the Aura Valley generates a valley exit jet close to midnight, which propagates through the foothills while its speed and height decrease. A maximum wind speed of about  $5\text{-}10\text{ ms}^{-1}$  from the southern sector is found in Lannemezan between 50 and 200 m above the ground, depending on the features of the mesoscale winds (Jiménez et al., 2019).

As in the previous answer, this is included in several of the paragraphs of the new Sect. 3, between pages 6-9.

**3) Both in the abstract and along the paper you associate the flow coming from NW's to mesoscale or synoptic scales. I agree with synoptic, but not with mesoscale, or at least not will all the mesoscale; for example, thermally-driven flows producing mountain breezes have their origin in the SE's and they are mesoscale flows. So, this should be revised along the paper.**

Response: According to your comment we have removed the word mesoscale in the sentences related to flows coming from NW's.

**4) You use the data from night-time (sunset to sunrise). As stably-stratified conditions are reached before the sunset, have you done any sensitivity test to what differences can be obtained in the results if you consider for example instead the sunset, the time when sensible heat flux changes sign and becomes negative?**

Response: We have not done any sensibility test - regarding this point we have followed the same approach as Lothon et al., (2014) and Blay-Carreras et al., (2014) about the sunrise and sunset time during this period and at this area. Considering your comment, we have added the following explanation in Sect. 4, page 11, between lines 20-23: "An alternative approach to calculate the stratification conditions could be to use the thermal gradient instead. However, throughout the paper we have considered the bulk potential temperature difference method described in Sun et al., (2016) which also provides good results and allows for a more consistent comparison within the Hockey-Stick theory framework."

**5) In section 2 (at the end of page 4) you mention that 5 min. is used to evaluate the turbulent quantities, and you cite some references. I think that it could be interesting to discuss a bit more the importance of using 5 min. instead of other temporal average (larger or shorter) in your study.**

Response: We have taken into account your comment and introduced it in the text, in Sect. 2, page 5 line 1-7: “[...] reducing the averaging period, or using other methods as multi-resolution decomposition or wavelet, might potentially eliminate the contribution of non-turbulent mesoscale motions to the calculated turbulence quantities (Terradellas et al., 2005; Udina et al., 2013; Ferreres et al., 2013; Soler et al., 2014). However, to obtain a broad picture of the patterns, a constant averaging time of 5 min. has seemed sufficient. In addition, as Mahrt (2017) stated, in very stable conditions, variation of turbulent fluxes on time-scales of a few minutes to tens of minutes are often associated with short periods of near-calm conditions where the turbulent fluxes are particularly small, and as a result its values are not very dependent on the averaging time.”

**6) I find difficult to follow the information given in Figs. 3-4, those where you show the wind roses. This is not the traditional way in which wind roses are represented (see for example Hullin et al., 2019; Fig. 2 for a better representation). By the way, I think this paper can be interesting for your present work and could be referenced. With regards to the information shown in these figures (3-4), I would like the authors to discuss more the differences found in wind direction distribution between Valimev and Skinfoflow towers, both for nIOPs and night-time whole dataset. For example, SE is clearly predominant for the Skinfoflow tower heights vs. Valimev for both datasets.**

Response: A different representation of wind roses is included in figures 3 and 4 in the new version of the paper. In addition, taking into account your comments and suggestions raised in questions 1, 2, 3 and 6, the Sect. 3 of the paper has been rewritten.

As in the previous answer, this is included in several of the paragraphs of the new Sect. 3, between pages 6-9.

**7) I think it could be interesting to discuss how do you estimate the intermittency of the turbulence. I think it is not enough explained along the manuscript. Moreover, in the literature there are different definitions of turbulence intermittency, so it is important to know what you are using in the present study.**

Response: Considering your comment, we have added the following explanation along the text, in Sect. 2, page 5, between lines 10 and 17: “In the atmospheric boundary layer (ABL), intermittency is basically found on the stable boundary layer (SBL) over land at night, especially under conditions of large static stability and strong vertical wind shear, when turbulence is sporadic, characterized by bursts or episodes with periods of relatively weak or un-measurable small fluctuations. In this paper we use the term “intermittency”, to describe specifically a temporal variation of turbulence intensity or turbulence strength, represented by the  $V_{TKE}$  value calculated at a fixed location, as Sun et al., 2012. Reasons for increased turbulence are diverse and may include the intrusion of coherent structures such as gravity waves, density currents (Terradellas et al., 2005;

Udina et al., 2013; Ferreres et al., 2013; Soler et al., 2014) and low-level jets (LLJs) (Mahrt, 1999; Newsom and Banta, 2003; Cuxart and Jimenez, 2007).”.

### **Specific comments.**

**1) Revise the order of the references when you are citing more than one. Generally chronological order should be used, and this is not always done in the manuscript (see e.g. pg. 4, lines 13-14; pg. 7 line 9; pg. 14, line 5; ...).**

Response: We have corrected for all the references in the wrong order along the manuscript (E.g. pg. 4 line 15)

**2) Pag. 2, lines 19-21: some reference could be given in relation with the TTE concept (Zilitinkevich et al., 2007, for example that you already have at the reference list).**

Response: We have added this reference at page 2, line 21.

**3) Pag. 3, line 29: replace pikes by peaks**

Response: We have replaced it. Pg 3, line 30.

**4) Pag. 3, line 30: I think it is less than 45 km.**

Response: When we refer to 45 km we are alluding to the higher mountains at the head of the valley. We make it clearer by differentiating the different distance to the main topographic features, i.e. the entrance to the valley, the Pic du Midi Massif, and, further up the valley, the highest mountains.

You can find the changes in page 3 between lines 27 and 33.

**5) Pag 4, line 10-11: I do not understand this sentence. Could you please revise it? I do not find any relationship with the phrase that comes next.**

Response: We have modified the paragraph to make it clearer, can be seen at page 4, line 13 and 14: “Two datasets with different sampling frequency were used from Skinfox mast levels between  $z_{2m}$  and  $z_{8m}$ : thermocouples (1 Hz) and sonic anemometers (10 Hz) (Table 1).”

**6) From my point of view, the information given in pag. 5 (lines 8-16) is difficult to understand as it is, and I think that it is not necessary and could be discarded. Maybe you can reference the papers by Said et al., but not giving the detailed information that comes next. However, I missed some post-processing information of the sonic data. For example, the kind of rotation applied (double rotation, planar fit?).**

Response: We have taken the suggestion into account in page 6 lines 1-3: “We follow the corrections and filters indicated in Said et al. (2011, a, b) and De Coster et al. (2011) report, where the post-processing applied to the BLLAST data is explained in detail (e.g. applying a planar-fit rotation to the wind direction dataset).”

**7) Pag. 6, lines 16-17. The reference Román-Cascón et al. (2018) is Román-Cascón et al. (2019) and the complete reference at the Reference list is also wrong (for example the title of the Journal); below you have the correct one.**

Response: Thank you, it has been checked & changed in page 6 lines 23-24.

**8) Pag. 6, lines 28-29: when you say at the lower levels, indicate exactly the levels considered. And in line 30, the same for the higher levels.**

Response: It has been checked & changed in page 7, line 8 and line 11.

**9) Pag. 7, lines 1-9. In this context, it can be interesting reference the results found by Jiménez et al. (2019).**

Response: As in 8), it is checked & changed in page 7 line 14.

**10) Pag. 7, lines 5-7: you relate the occurrence of NW at higher levels with a SBL height below the Valimev tower and strong synoptic forcing. Have you ccheck this point? Have you estimate the SBL the SBL height? From my point of view, when strong synoptic forcing is present then the nocturnal ABL height should be weakly stably-stratified and the ABL height should be quite larger than the 60 m.**

Response: In the new manuscript, Sect. 3 has been extensively modified, from page 6 to 9.

**11) Pag. 7, lines 5-7: I cannot see in Fig. 2a the very small valley you mention at the south of the Skinflo tower. Could you give more information on this gully (slope and orientation)? It can be quite interesting to know it.**

Response: We have included an arrow pointing the gully in Figure 2.b (Page 4) where the gully can be seen at the south-east of the Skinflo mast. This small angle slope is orientated towards the NW.

**12) Pag. 7, lines 10-13: When you reference the SDF described by Román-Cascón et al. (2015), it is said that it ranges from noon 1<sup>st</sup> July to morning 2<sup>nd</sup> July, including nIOP8. This is wrong. The period analysed in Román-Cascón et al. (2015) ranges approx. from 1800 to 2200 UTC on the 2<sup>nd</sup> July (IOP10), and the SDF lasts from 1930 to 2030 UTC approx.**

Response: Thank you for correcting these details. We have changed the reference to the correct period in page 7 lines 14 and 15.

**13) Pag. 7, line 13: Change 1<sup>st</sup> July by 2<sup>nd</sup> July.**

Response: As in 12), we have modified it in page 7, line 17.

**14) Pag. 9, lines 1-2: It is said that the MPF is from SW. However, in pag. 6, line 31 it is mentioned that MPF comes from the SE quadrant. Could you explain this contradiction?**

Response: As this section has been extensively modified and improved, this contradiction is no longer in the text.

**15) Pag. 10, lines 30-32 and pag. 11, lines 1-2: A comment in the line of that done in comment 10); you justify that regime 2 does not behave as HOST for the 60 m for the largest winds because this height could be above the height of the SBL. However, I would not expect this just for the highest winds, where the NBL can be higher due to the mechanical turbulence generated for stronger winds.**

Response: We would like to remark that this phenomenon is mainly found due to the scarcity of measurements for these wind speed bins at these levels. Therefore, no real conclusions can be drawn from it. We have proceeded to write it with more emphasis in the paper, as can be seen in page 11 lines 9-12.

**16) Pag. 12, lines 13-15: “the turbulence intensity can be enhanced due to the presence of coherent structures”. My question is: for what range of wind speed do you think it is more relevant the present of coherent structures (CS) and why? In relation with this question, in the same page, line 18-21, it would seem that you have more presence of coherent structures. Do you really think that CS are related to NBL more than SBL? Could you please clarify this in the discussion?**

Response: The presence of significant turbulence (intermittent burst) created by coherent structures is a characteristic of very stable boundary layers with light winds and large stability conditions (Terradellas et al., 2005; Udina et al., 2013; Ferreres et al., 2013; Soler et al., 2014). We introduced the coherent structures in the Introduction, page 2, line 11-14.

**17) Pag. 12, line 26: ‘big difference’. Could you explain these differences? In line 28, when you use ‘In addition’, it seems that you are going to discuss about Skinfo tower, but you are referring to Valimev tower. Clarify it please.**

Response: This text has been removed in the new manuscript.

**18) Pag. 16, lines 6-7: ‘There are few outliers in z3m and z5m since the surface smooths the quick shifts of wind speed and direction’; could you please explain better this sentence?**

Response: In the new manuscript, this phrase has been erased.

**19) Pag. 17, lines 3-8: in this paragraph you are discussing the presence of outliers in the SE’s directions, and in part is related to the presence of storms and low pressure systems affecting this region. I think that at least low-pressure systems are related to NW’s not SE’s directions.**

Response: Fig. 8. and 9 refer (Sect. 5) to all the dataset, where SE’s wind direction range not only are related to mesoscale flows, but can also include synoptic scale phenomena, as for example a low-pressure system. As can be seen in the BLLAST daily forecast report, for e.g. days 25 and 26 of June. The link to the webpage is:  
<http://boc.sedoo.fr/source/dirCurrent.php?current=20110625&nav=Dailyforecastreport>

**20) Pag. 19, line 5: when you mention ‘atmospheric disturbances’, at what scales are you referring to? Are internal gravity waves or other submeso motions important in this context?**

Response: The sentence is rewritten in page 18, lines 6-8, as: “Category B corresponds to the enhancement of turbulence within the regime 1 caused by atmospheric disturbances as internal gravity wave, density currents, and low-level jets (LLJs), that increases local turbulence and may reduce the local stability, even inducing some intermittency.”.

**21) Pag. 19, lines 7-9: why don’t you consider SW’s instead of nIOPs to illustrate the intermittency categories? In fact, you can have suitable conditions (SBL) even when an IOP is not defined in BLLAST.**

Response: We have considered nIOPs because in BLLAST field campaign not all the SE’s wind directions correspond to nIOPs and the intermittency categories are defined for very stable conditions.

**22) Pag. 20, lines 1-11. The paper from Román-Cascón et al. (2019) does not use BLLAST data (this is done in Román-Cascón et al., 2015), although they characterize the thermally-driven flows at the BLLAST site. So please cite both papers properly.**

Response: Thanks for your comment. See correction at page 19, lines 4-14 and page 20 line 1.

**23) Pag. 20, lines 10-11: ‘The categories can also be found during other nIOPs’. Please indicate explicitly those nIOPs.**

Response: This has been included in page 19, line 13-14, in Sect. 6.1: “Category A can be found in all the nIOP cases but nIOP10. Category B is not so frequent, occurring for short periods during the nIOPs 01, 02, 03, 04, 05, 07, 09.”.

**24) Pag. 21, lines 19-23: Can you indicate any references at the end of this paragraph?**

Response: We have included some references at page 20, line 25-26.

**25) I cannot find the purple line, corresponding to the 30m height.**

Response: As stated in the caption of former Fig. 12, now Fig. 11 (Sect. 6.1, page 21), the virtual potential temperature of the 30-m level is not displayed due to the limited availability of the Skinfoam mast thermocouple data.

**26) Pag. 21, Figure 12 caption: I understand that category A is related to MP flow and category B to SDF, so it would be clearer if you state: Both stages... enhancement of turbulence... and transitions between reg. 1 to reg. 2 respectively.**

Response: We have modified the text so that it is clearer. Now this figure caption corresponds to the new Fig. 11 (Sect. 6.1, page 21) and the new text is as follows: “The

shallow drainage flow (SDF) stage is indicated between 1855 and 2020 UTC, and a consecutive mountain-plain flow (MPF) stage thereafter. In the SDF stage there are oscillations within regime 1, which is category B, whereas in MPF stage there are transitions between regime 1 and regime 2.”.

**27) Pag. 24, line 12-13: ‘mesoscale and synoptic scale meteorological situations’. According to this statement, mountain breezes, SE’s are not a mesoscale flow?**

Response: Taking into account the 3<sup>rd</sup> general comment by the referee, mesoscale is replaced by synoptic scale in page 23, line 17.

**28) Pag. 24, lines 17: ‘whole nocturnal dataset’ or it should say ‘whole SE’s nocturnal dataset’?**

Response: As you noted, it should say ‘whole nocturnal dataset’. We have corrected it in page 24, line 2.

**29) Pag. 25, line 6: after C you could add ‘related to turbulence intermittency’.**

Response: We have added “related to turbulence intermittency” in the same line. Now page 24, line 10.

**30) Pag. 25, lines 9-10: Could you explain how local shear can be generated by internal gravity waves?**

Response: We have modified it in page 24 line 13-16 to: “Local shear can be generated by internal gravity waves of relatively small wind speed amplitude so that the wind speed is lower than the threshold value. As a result, there is an increase of turbulence within regime 1 (Sun et al., 2012), which is the category B turbulence transition. Mahrt (2010a) found that with very weak winds and strong stratification (regime 1), turbulence can appear under the presence of gravity waves.”.

**31) Pag. 27, lines 33-35: This paper is already published, and the right journal is ‘Atmospheric Research’ and not ‘Atmospheric Environment’. Please change it.**

Response: Thanks for the comment, the journal citation has been corrected in page 28 lines 9-11.



# Nocturnal boundary layer turbulence regimes analysis during the BLLAST campaign

Jesús Yus-Díez<sup>1,5</sup>, Mireia Udina<sup>1</sup>, Maria Rosa Soler<sup>1</sup>, Marie Lothon<sup>2</sup>, Erik Nilsson<sup>3</sup>, Joan Bech<sup>1</sup>, and Jielun Sun<sup>4</sup>

<sup>1</sup>Departament de Física Aplicada - Meteorologia, Universitat de Barcelona, C/Martí i Franquès, 1., 08028, Barcelona, Spain

<sup>2</sup>Laboratoire d'Aérodynamique, University of Toulouse, CNRS, France

<sup>3</sup>Department of Earth Sciences, Uppsala University, Uppsala, Sweden

<sup>4</sup>NorthWest Research Associates, Boulder, Colorado, USA

<sup>5</sup>Institute of Environmental Assessment and Water Research (IDAEA-CSIC), C/Jordi Girona 18-26, 08034, Barcelona, Spain

**Correspondence:** Jesús Yus-Díez (jesus.yus@idaea.csic.es), Mireia Udina (mudina@meteo.ub.edu)

**Abstract.** A night-time turbulence regime classification, the so-called HOckey-Stick Transition (HOST) theory, proposed by Sun et al. (J Atmos Sci 69(1):338-351, 2012) from the Cooperative Atmosphere-Surface Exchange Study 1999 (CASES-99) is explored using data from the Boundary-Layer Late Afternoon and Sunset Turbulence (BLLAST) field campaign which took place during the summer 2011 in the ~~north-of-the~~ central French Pyrenean foothills.

- 5 Results show that the HOST turbulence relationships for the BLLAST field campaign data ~~is~~are strongly dependent on both the meteorological and orographic features. The HOST pattern only appears for nights when a stably stratified boundary layer can be developed, corresponding to fair weather and clear sky nights, when the flow is generated by the nearby orography, from the south and ~~southeast~~south-east directions. Those flows strongly influenced by the orography may generate intermittent or enhanced turbulence. When considering the whole nocturnal dataset for these flow directions, several enhanced turbulence
- 10 points are found to be associated with sudden wind speed and directional shear transitions. In contrast, flows from other directions do not reproduce the HOST ~~relationship~~relationships and the turbulence relationship is almost linear, independent of ~~the~~-vertical temperature gradients, corresponding to flows driven by ~~mesoscale~~or-synoptic scales. In addition we identify examples of gravity waves and top-down turbulent events that lead to transitions between the turbulence regimes.

*Copyright statement.* TEXT

## 15 1 Introduction

With the aim to investigate and categorise turbulence patterns generated by wind shear in the atmospheric stable boundary layer (SBL), Sun et al. (2012) analysed a month-long dataset collected in Kansas from the Cooperative Atmosphere-Surface Exchange Study in October 1999 (CASES-99) (Poulos et al., 2002). They found that, depending on the relationship between the turbulence intensity of the flow and the wind velocity, turbulent mixing from the surface to the last level of measurement

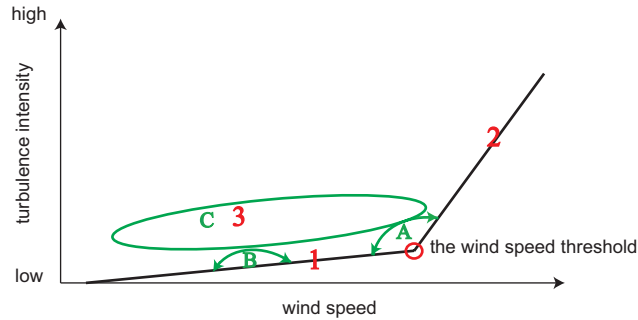

**Figure 1.** Schematic representation of the HOckey-STick (HOST) theory with the three turbulence regimes (regime 1, 2 and 3) and the three turbulence intermittency categories (~~eat-~~[category A](#), ~~eat-~~[category B](#) and ~~eat-~~[category C](#)). Reproduced from Figure 2 of Sun et al. (2012) ©American Meteorological Society. Used with permission.

(55m) can be categorised in three regimes (Fig. 1). A regime 1 occurring when the wind speed ( $V$ ) is less than a threshold value ( $V_T$ ), characterised by low turbulence intensity increasing slightly with the velocity. This is the weak turbulence regime, which is generated by local shear and modulated by the vertical temperature gradients of the SBL. Eddies generated by local shear,  $\delta V/\delta z$ , do not interact with the ground as their length scale is smaller than the observation height  $z$ ,  $\delta z < z$  (Sun et al., 2012). When  $V > V_T$  regime 2 occurs and turbulence is mainly driven by the bulk shear, therefore increasing strongly and nearly linearly with  $V$ . The close relationship between turbulence intensity and mean wind speed suggests that near the ground, turbulence under moderate winds responds to the bulk shear  $V(z)/z$  (Sun et al., 2012, 2016). The eddies dominating this stronger turbulence regime have a larger scale of  $z$ , thus leading to a well mixed layer below this height and producing a near-neutral stratification. The value of the wind speed threshold at which the shear changes from local to bulk increases with height approximately logarithmically (Sun et al., 2012; Bonin et al., 2015). In addition to these two turbulent regimes generated by the local or the bulk shear, moderate turbulence can be often generated for relative low values of  $V$  and large stability conditions above the observation level by different coherent structures, for instance: Kelvin- Helmholtz instabilities (Newsom and Banta, 2003), gravity waves (Sun et al., 2004; Udina et al., 2013), and density currents (Sun et al., 2002; Viana et al., 2010; Soler et al., 2014) which can generate turbulence, that is transported downward, toward observation levels where the wind speed is smaller-lower than the threshold value. This top-down turbulent regime is defined as regime 3, which also includes turbulence enhanced by wind shear associated ~~to~~ with topographical features leading to flow accelerations, directional wind shear and sub-meso motions (Mahrt et al., 2013). All these intermittent turbulent events have in common the non-stationarity of the flow.

The schematic representation of the transition between the weak and the strong turbulence regimes resembles a ~~HO~~ockey-Stick Hockey-Stick (Fig. 1), this is why this theory is named ~~HO~~ockey-stick-HOockey-Stick Transition (HOST). It can be explained in terms of total turbulence energy (TTE) defined as the sum of the turbulent kinetic energy (TKE) and the turbulent potential energy (TPE), also called available potential energy (Zilitinkevich et al., 2007). As shown in Sun et al. (2016), if the vertical variation of TTE is small, the turbulence shear production controls the variation of TTE. When  $V < V_T$  the vertical transport

of cold air is confined near the surface, the stable stratification of the flow increases. Therefore more turbulence energy is used to increase the TPE (Lin and Pao, 1979), and TKE does not increase significantly with increasing  $V(z)$ . This situation corresponds to regime 1. However, if  $V > V_T$  the stable stratification is considerably reduced, leading to a near-neutral regime. As a consequence, shear generates TKE as the TTE is not consumed to increase TPE, this situation corresponds to regime 2.

5 The HOST theory represents a new approach for the turbulence parameterisation in the surface layer, as the Monin Obukhov Similarity Theory (MOST) may be limited, because the bulk formulae are applicable only within a near thin surface layer (Sun et al., 2012, 2016). The theory has been previously studied for other campaigns and sites in relatively flat terrain areas. Mahrt et al. (2013) studied the turbulence behaviour in three sites with different surface roughness, showing that the wind speed threshold decreases with increasing roughness length; Andreae et al. (2015) explored the three turbulence regimes and  
10 characterised the nocturnal boundary layer using data from The Amazon Tall Tower Observatory (ATTO); Bonin et al. (2015) used the HOST via remote sensing in the Southern Great Plains and Acevedo et al. (2016) studied the HOST theory via the contrasting structures of the stable and neutral states of the boundary layer over snow-covered surfaces. The theory has also been investigated through large eddy simulation (LES) models (Udina et al., 2016), revealing the LES difficulties to reproduce regime 1.

15 As the HOST was originally derived from measurements taken in a relatively flat area, where the CASES-99 field campaign was held (Sun et al., 2012), the aim of this study is to explore the validity of the HOST theory in a complex terrain area, for flows that are influenced by the nearby orography. [This study considers nocturnal boundary layers with special emphasis in the very stable boundary layer.](#) The data analysed herein is from the Boundary Layer Late Afternoon and Sunset Turbulence (BLLAST) campaign (Lothon et al., 2014), which took place during early summer of 2011 in France, in the “Plateau de  
20 Lannemezan”, north of the central French Pyrenean foothills.

The structure of the paper is as follows. The site, the in situ observations of near surface turbulence obtained from the array of instruments and the data processing method applied are described in Sect. 2. The wind flow and wind regimes affecting the site during the BLLAST field experiment are analysed in Sect. 3. The categorisation of the turbulence regimes patterns for the BLLAST field campaign is investigated in sections 4 and 5, while the transition between regimes is illustrated in Sect. 6 using  
25 selected examples. A summary and the main conclusions are given in Sect. 7.

## 2 Site, observations and data processing

Data used in this study comes from the BLLAST field campaign conducted in early summer, from 14 June to 8 July 2011 in France around the Centre for Atmospheric Research (CRA, *Centre de Recherches Atmosphériques*) (Lothon et al., 2014). The site (site 1 in Fig. 2a) is located in the ~~region called~~ “Plateau de Lannemezan”, which is a plateau over the Garonne basin at  
30 about 600 m above sea level (a.s.l.), ~~a few kilometres north to the Pyrenean foothill, with pikes.~~ [The plateau is about 11 km north from the base of the first range of the Pyrenees with peaks](#) of around 1500-2000 m a.s.l. ~~, and about 45 and about 40 km away from of~~ the highest peaks of the Pyrenees mountain range, ~~at around 3000 a. s.l. in the border with Aragón, Spain.~~ The site is influenced by [both](#) the steep orography ~~at the southwest surrounding it at the south-west~~ (Pic du midi de Bigorre) ~~and~~

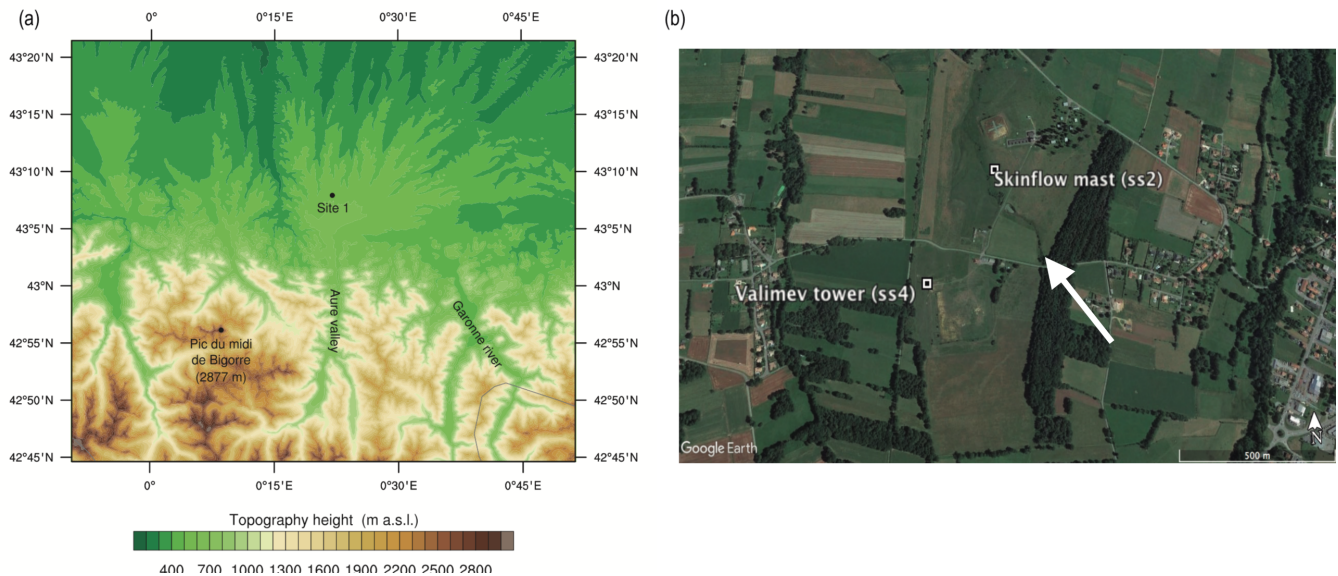

**Figure 2.** Location of the “Plateau de Lannemezan” and the surrounding area with: (a) a topographical map of the surroundings of site 1 where the BLLAST field campaign took place showing terrain elevation of the area, with the Pyrenees mountain range at its south and the location of the Aure valley and the Garonne river, and; (b) aerial satellite view zoom to the of site 1 with showing the location of the Skinflow mast at surface-site 2 (ss2) and, the Valimev tower at surface-site 4 (ss4) and a small gully south-east of the Skinflow mast (white arrow).

the Aure and Garonne valleys located as well as the exit of the Aure valley (Aure in local occitan language) at the south and at around 11 km. The Garonne upper-valley is at the east-southeast, respectively (Fig. 2a).

The main objective of the BLLAST field campaign was to improve the knowledge of the afternoon and evening transition in the Boundary Layer (BL) (Lothon et al., 2014). To achieve this, a dense array of instrumentation was deployed over the area, although only some of them are employed herein (Table 1). We focus the analysis on the data from the 10 m mast of the surface-site 2 (ss2), called Skinflow mast, and the 60 m tower placed at the surface-site 4 (ss4), called Valimev tower (Fig. 2b). From the Skinflow mast we use data from the sensors located at 2.23 m, 3.23 m, 5.27 m and 8.22 m (named hereafter  $z_{2m}$ ,  $z_{3m}$ ,  $z_{5m}$  and  $z_{8m}$ , respectively) and from the, although the  $z_{2m}$  level is omitted when the values are very close to those of  $z_{3m}$ . From the Valimev tower we use data from the sensors located at 29.4 m, 45.8 m and 61.4 m (named hereafter  $z_{30m}$ ,  $z_{45m}$  and  $z_{60m}$ , respectively), see Table 1.

Since the analysis is restricted to the night-time, we only consider data measured from 1942 UTC to 0420 UTC, the sunset and sunrise hours on 27 June 2011, which is the day in the middle of the study period (Lothon et al., 2014; Blay-Carreras et al., 2014) which is representative of the sunrise and sunset time during this period and at this area. An alternative method to select the study periods would be to consider the time when sensible heat flux changes its sign instead of the sunset and sunrise but the first approach was followed for consistency with previous studies.

**Table 1.** Skinfoam mast and Valimev tower sonic measurements from the BLLAST field campaign used in this study.

| Level name | Height [m] | Measured variables                                            | Sensors                                                                 | Data period                |
|------------|------------|---------------------------------------------------------------|-------------------------------------------------------------------------|----------------------------|
| $z_{2m}$   | 2.23       | $T$ [ $^{\circ}\text{C}$ ], $(u, v, w)$ [ $\text{m s}^{-1}$ ] | Campbell Thermocouple E-Type FW05<br>Campbell Csat3 3D sonic anemometer | 19 June 2011 - 8 July 2011 |
| $z_{3m}$   | 3.23       |                                                               |                                                                         |                            |
| $z_{5m}$   | 5.27       |                                                               |                                                                         |                            |
| $z_{8m}$   | 8.22       |                                                               |                                                                         |                            |
| $z_{30m}$  | 29.4       |                                                               | Campbell Csat3 3D sonic anemometer                                      | 14 June 2011 - 8 July 2011 |
| $z_{45m}$  | 45.8       |                                                               | Gill master pro 3D sonic anemometer, wind vane                          |                            |
| $z_{60m}$  | 61.4       |                                                               | Campbell Csat3 3D sonic anemometer                                      | 15 June 2011 - 8 July 2011 |

~~From the Skinfoam mast thermocouples and sonic anemometers deployed~~ Two datasets with different sampling frequency were used from Skinfoam mast levels between  $z_{2m}$  and  $z_{8m}$ , ~~we have used two different sets of data. The  $z_{2m}$  level is omitted when results were very similar to those from  $z_{3m}$ . The~~ thermocouples (1 Hz) and sonic anemometers (10 Hz) (Table 1). The timespan of available measurements for the Skinfoam mast levels starts on ~~the~~ 19 June 2011 and finishes on ~~the~~ 8 July 2011.

- 5 Firstly, ~~a set with a temporal average of 5 is used for a~~ For the statistical study of the ~~behaviour~~ behavior of the turbulence strength relationship with the wind speed (~~Sun et al., 2012; Mahrt, 2014; Sun, 2011~~), ~~where the we set a temporal average of 5 min as done in Sun (2011); Sun et al. (2012); Mahrt (2014).~~ We used this temporal average because reducing the averaging period, or using other methods as multi-resolution decomposition or wavelet, might potentially eliminate the contribution of non-turbulent mesoscale motions to the calculated turbulence quantities (Terradellas et al., 2005; Udina et al., 2013; Ferreres et al., 2013; S
- 10 However, to obtain a broad picture of the patterns, a constant averaging time of 5 min. has seemed sufficient. In addition, as Mahrt (2017) stated, in very stable conditions, variation of turbulent fluxes on time-scales of a few minutes to tens of minutes are often associated with short periods of near-calm conditions where the turbulent fluxes are particularly small, and as a result its values are not very dependent on the averaging time. The high frequency signal of the turbulence is used to calculate average statistics to show a broad picture of the patterns. ~~Secondly~~ Whereas when the aim is to show with more detail the temporal
- 15 ~~evolution of the turbulent variables~~, a small temporal average set with averages ranging between 10 s and 1 min is obtained. This high-frequency ~~data aims to show with more detail the temporal evolution of some variables which~~ procedure aims to account for the turbulence intermittency within and between the different turbulent regimes defined in the HOST theory. In
- 20 ~~the atmospheric boundary layer (ABL), intermittency is basically found on the stable boundary layer (SBL) over land at night, especially under conditions of large static stability and strong vertical wind shear, when turbulence is sporadic, characterized by bursts or episodes with periods of relatively weak or un-measurable small fluctuations. In this paper we use the term "intermittency", to describe specifically a temporal variation of turbulence intensity or turbulence strength, represented by the  $V_{TKE}$  value calculated at a fixed location, as Sun et al., 2012. Reasons for increased turbulence are diverse and may include the~~

intrusion of coherent structures such as gravity waves, density currents (Terradellas et al., 2005; Udina et al., 2013; Ferreres et al., 2013; So low-level jets (LLJs) (Mahrt, 1999; Newsom and Banta, 2003; Cuxart and Jiménez, 2007).

From the Valimev 60 m tower we have used the measurements from the sonic anemometers located at the  $z_{30m}$ ,  $z_{45m}$  and  $z_{60m}$  levels, as shown in Table 1. The dataset for this tower starts on ~~the~~ 14 June ~~of~~ 2011 for the  $z_{30m}$  and  $z_{45m}$  levels, and  
 5 slightly later for  $z_{60m}$ , between 1000-1100 UTC of ~~the~~ 15 June 2011, and finishes on ~~the~~ 8 July 2011 for the three levels. The same data processing as to the Skinflow mast levels measurements is applied to the Valimev levels, using temporal averages of 5 min and averages ranging between 10 s and 1 min as well.

We ~~apply the following~~ follow the corrections and filters, ~~according to Said et al. (2011a, b).~~ The wind direction at the  $z_{30m}$ ,  $z_{45m}$  and  $z_{60m}$  levels is modified by adding a constant phase  $\phi = -90^\circ$  to account for the orientation of the sonic anemometer.  
 10 ~~Moreover, wind directions computed from the horizontal wind components,  $u$  and  $v$ , need phase corrections of  $318.71^\circ$  for the sonic anemometer at  $z_{30m}$ ,  $73.8^\circ$  for the Gill sonic anemometer at  $z_{45m}$   $21.5^\circ$  for the wind vane at  $z_{45m}$  and  $329.71^\circ$  for the sonic anemometer at  $z_{60m}$  indicated in Said et al. (2011a, b) and De Coster et al. (2011) report, where the post-processing applied to the BLLAST data is explained in detail (e.g. applying a planar-fit rotation to the wind direction dataset).~~ Additionally, wind components were discarded when the difference between the ultrasonic estimation at  $z_{30m}$ ,  $z_{45m}$ , and  $z_{60m}$  and the wind  
 15 vane at  $z_{45m}$  were greater than a threshold of  $2.5 \text{ m s}^{-1}$ ,  $1.5 \text{ m s}^{-1}$ , and  $3.5 \text{ m s}^{-1}$ , respectively. The standard deviation for the horizontal and vertical velocity greater than  $4 \text{ m s}^{-1}$  and  $2 \text{ m s}^{-1}$ , respectively, are also discarded. Finally, sonic measurements were not considered when anomalous TKE  $V_{TKE}$  values were observed during ~~heavy rain periods.~~ rainfall periods.

We calculate several parameters in order to study the turbulence regimes relationships: the wind speed,  $V$ :

$$V = \sqrt{u^2 + v^2} \quad (1)$$

20 where  $u$  and  $v$  are the horizontal wind components; the turbulence intensity or turbulence strength,  $V_{TKE}$ :

$$V_{TKE} = \sqrt{\frac{1}{2}(\sigma_v^2 + \sigma_w^2)} \quad (2)$$

where  $\sigma$  represents the standard deviation of the wind components, and  $\sigma_v^2 = \sigma_u^2 + \sigma_v^2$ ; the potential virtual temperature:

$$\theta_v = T_v + \Gamma_d z \quad (3)$$

where  $T_v$  is the ~~air~~ virtual temperature at each height  $z$  and  $\Gamma_d$  is the dry adiabatic lapse rate; and the skewness of the vertical  
 25 velocity fluctuations (Wyngaard, 2010):

$$S_w = \frac{\overline{w'(z)^3}}{(\overline{w'(z)^2})^{3/2}} \quad (4)$$

which gives us information about the vertical transport (upward or downward) of the vertical velocity variance.

Furthermore, when the relationship  $V_{TKE}$  vs  $V$  is graphically analysed we use the bin-average technique where we group the data into wind speed bins of  $0.4 \text{ m s}^{-1}$  starting at a wind speed of  $0.1 \text{ m s}^{-1}$ . For each of those bins it is displayed the median  
 30 value with the corresponding error bars. These error bars represent the first and third quartiles instead of the actual standard

deviation as a consequence of the skewed distribution of the turbulence points for each wind speed bin. This bin-averaged technique is also employed for the box plot analysis. In addition, we have made an exhaustive analysis in order not to consider the measurements collected under strong precipitation events, where the sonic anemometers do not work properly.

### 3 Flow characterisation during the BLLAST field campaign

5 The objective of the paper is to study how the HOST theory behaves in the complex terrain environment for the BLLAST field experiment in the nocturnal boundary layer. In the area, during night-time when thermally-driven flows can be developed, a katabatic flow going down from the mountain to the plain is established, through valley and downslope winds (~~?~~(Román-Cascón et al., 2015; Román-Cascón et al., 2019)). Since the HOST theory proposed by Sun et al. (2012, 2016) during the CASES-99 campaign corresponds to nights with clear skies and intense radiative cooling allowing the development of local and mesoscale winds, we first select the nights that meet these conditions during the BLLAST campaign. This is done similarly as Lothon et al. (2014) selected the intensive observation periods (IOPs) in BLLAST, focused on the diurnal and the late-afternoon transition boundary layer analysis. ~~Therefore~~Instead, we consider as ~~IOP-nights, hereafter nIOPs~~a IOP night, hereafter nIOP, the period between 1942 UTC of that IOP day and 0420 UTC of the following day (Blay-Carreras et al., 2014). That is, the evening, night and early morning following an IOP day, excluding any nocturnal period strongly influenced by ~~synoptic-larger scale~~synoptic phenomena, such as a synoptic frontal system or mesoscale convective systems. In the case when the night-time period prior to the IOP shows the typical nocturnal flow cycle, we do consider the early morning of the corresponding IOP, i.e. from 0000 to 0420 UTC. Following these criteria, table 2 shows the nocturnal periods considered as nIOPs.

To characterise the wind flow regimes on the Plateau de Lannemezan for the nIOPs, the first step is to calculate the wind roses for each level of measurement, both for the Skinflow mast and the Valimev tower. Fig. 3 shows that ~~most 25 %~~most 25 % of the flows ( ~~$\Rightarrow 60 \%$~~  $\Rightarrow 60 \%$ ) at the lower levels,  ~~$z_{3m} - z_{8m}$~~  $z_{3m} - z_{8m}$ , come from the ~~southeast quadrant, corresponding south-east quadrant, which correspond~~southeast quadrant, corresponding south-east quadrant, which correspond to shallow drainage flows, formed after sunset due to local and very small slopes located in the foothills of the Pyrenees (Román-Cascón et al., 2015). ~~At the higher levels~~At the higher levels. ~~These authors tested that up to 4 days of the BLLAST campaign presents SDFs after the near calm period of the afternoon, exhibiting a wind maxima, around  $1.5 - 2 \text{ m s}^{-1}$  close to the surface, in the first 5 m a.g.l.~~These authors tested that up to 4 days of the BLLAST campaign presents SDFs after the near calm period of the afternoon, exhibiting a wind maxima, around  $1.5 - 2 \text{ m s}^{-1}$  close to the surface, in the first 5 m a.g.l. ~~At higher levels,  $z_{30m} - z_{60m}$ , wind roses show a large fraction of winds coming from the southeast quadrant (40 % south-east quadrant (35 % of the data), which are associated with the larger scale mountain plain circulation (Román-Cascón et al., 2015), with another large fraction coming from the northwest quadrant (25 - 30 % of all data) associated to the typical synoptic flows affecting the site (Barneoud et al., 2010). In BLLAST it is a common feature during the IOPs the presence of diurnal anabatic winds from the valleys located north of the site, which progressively veer towards the south as the sun sets, firstly nearby the mountains and then as katabatic winds flowing through the valley towards the site (Jimenez and Cuxart, 2014). The occurrence of the north-westerlies at high levels could be associated with the fact that the SBL top may be below the higher measurements levels of the Valimev tower, thus the synoptic forcing is too strong, and the wind is forced by this scale. Another relevant detail that has to be addressed and that is perceived in the wind roses of the low~~At higher levels,  $z_{30m} - z_{60m}$ , wind roses show a large fraction of winds coming from the southeast quadrant (40 % south-east quadrant (35 % of the data), which are associated with the larger scale mountain plain circulation (Román-Cascón et al., 2015), with another large fraction coming from the northwest quadrant (25 - 30 % of all data) associated to the typical synoptic flows affecting the site (Barneoud et al., 2010). In BLLAST it is a common feature during the IOPs the presence of diurnal anabatic winds from the valleys located north of the site, which progressively veer towards the south as the sun sets, firstly nearby the mountains and then as katabatic winds flowing through the valley towards the site (Jimenez and Cuxart, 2014). The occurrence of the north-westerlies at high levels could be associated with the fact that the SBL top may be below the higher measurements levels of the Valimev tower, thus the synoptic forcing is too strong, and the wind is forced by this scale. Another relevant detail that has to be addressed and that is perceived in the wind roses of the low

**Table 2.** Night-time data, between 1942 and 0420 UTC, of the Skinfox mast and Valimev tower levels considered as IOPs nights. The temporal series starts the 14 of June for the first two levels with sonic anemometers of the Valimev tower, and the 15 of June for  $z_{60m}$ ; for the Skinfox data, the measurements began the 19 of June.

| nIOP   | Corresponding night-time IOP | Date (dd/mm)            | Levels              |
|--------|------------------------------|-------------------------|---------------------|
| nIOP00 | IOP00-IOP01                  | 14/06-15/06             | $z_{30m}, z_{45m}$  |
| nIOP01 | IOP02-IOP03                  | 19/06-20/06             | $z_{30m} - z_{60m}$ |
| nIOP02 | IOP03                        | 20/06 (1942-2359 UTC)   | $z_{3m} - z_{60m}$  |
| nIOP03 | IOP04-IOP05                  | 24/06-25/06             | $z_{3m} - z_{60m}$  |
| nIOP04 | IOP05-IOP06                  | 25/06-26/06             | $z_{3m} - z_{60m}$  |
| nIOP05 | IOP06-IOP07                  | 26/06-27/06             | $z_{3m} - z_{60m}$  |
| nIOP06 | IOP07                        | 27/06 (1942-2100 UTC)   | $z_{3m} - z_{60m}$  |
| nIOP07 | IOP08-IOP09                  | 30/06-01/07             | $z_{3m} - z_{60m}$  |
| nIOP08 | IOP09-IOP10                  | 01/07-02/07             | $z_{3m} - z_{60m}$  |
| nIOP09 | IOP10 - 03/07                | 02/07-03/07             | $z_{3m} - z_{60m}$  |
| nIOP10 | IOP11                        | 05/07 (0000 - 0420 UTC) | $z_{3m} - z_{60m}$  |

levels is that the Skinfox mast is located at the north part of a very small gully (Fig. 2b), a formation of a very local shallow drainage flow is possible (Nauta, 2013; Soler et al., 2002) during the very SBL.

An example of these shallow drainage flows (SDF) and mountain plain flows (MPF) is shown in Román-Cascón et al. (2015); flows (MPFs). In this case the location of the maximum wind is higher, at 80 m as state Román-Cascón et al. (2015), or between 50 and 200 m corresponding to the Aura valley exit flow (Jiménez et al., 2019). To document the SDFs and the MPFs, we present an example shown in Román-Cascón et al. (2015) between noon of the 1st-2nd of July and the morning of the 2nd 3rd July 2011, including nIOP08nIOP09. The predominant direction during the central part of the day-time is from the north corresponding to the uphill direction (Jimenez and Cuxart, 2014), with a wind speed on average an average wind speed of  $2 \text{ s}^{-1} \text{ m s}^{-1}$ . Later that day, the 1st-2nd of July, at 1800 UTC, the wind turns to south-southeast-south - south-east, first at the lower levels, which correspond to drainage winds with lower velocities, and two hours later, at 2000 UTC, the wind turns to southeast-veers towards south-east at all the levels increasing its velocity up to  $5 \text{ s}^{-1}$  associated to  $\text{m s}^{-1}$  associated with a mountain plain flow. The presence of a gully south to the Skinfox mast (Fig.2b) has a relevant effect on the wind (Fig. 3) due to the frequent formation of a shallow drainage flow under very stable conditions (Nauta, 2013; Soler et al., 2002). The night flow for those stable nights has an intermittent nature since it is generated by drainage flows, mountain-plain and other mesoscale phenomena induced by the temperature gradients between the plains and the most septentrional-northern mountain ranges of the Pyrenees located at the south of the site.

Fig. 3 also shows that the Valimev tower presents a remarkable fraction (25 – 30 % of all data), of winds from the west and north-west, which can be closely connected to the fact that during the central part of the day preceding nIOPs, the wind is from the north-north-west direction corresponding to the uphill direction, but turns to the south-east direction two hours after



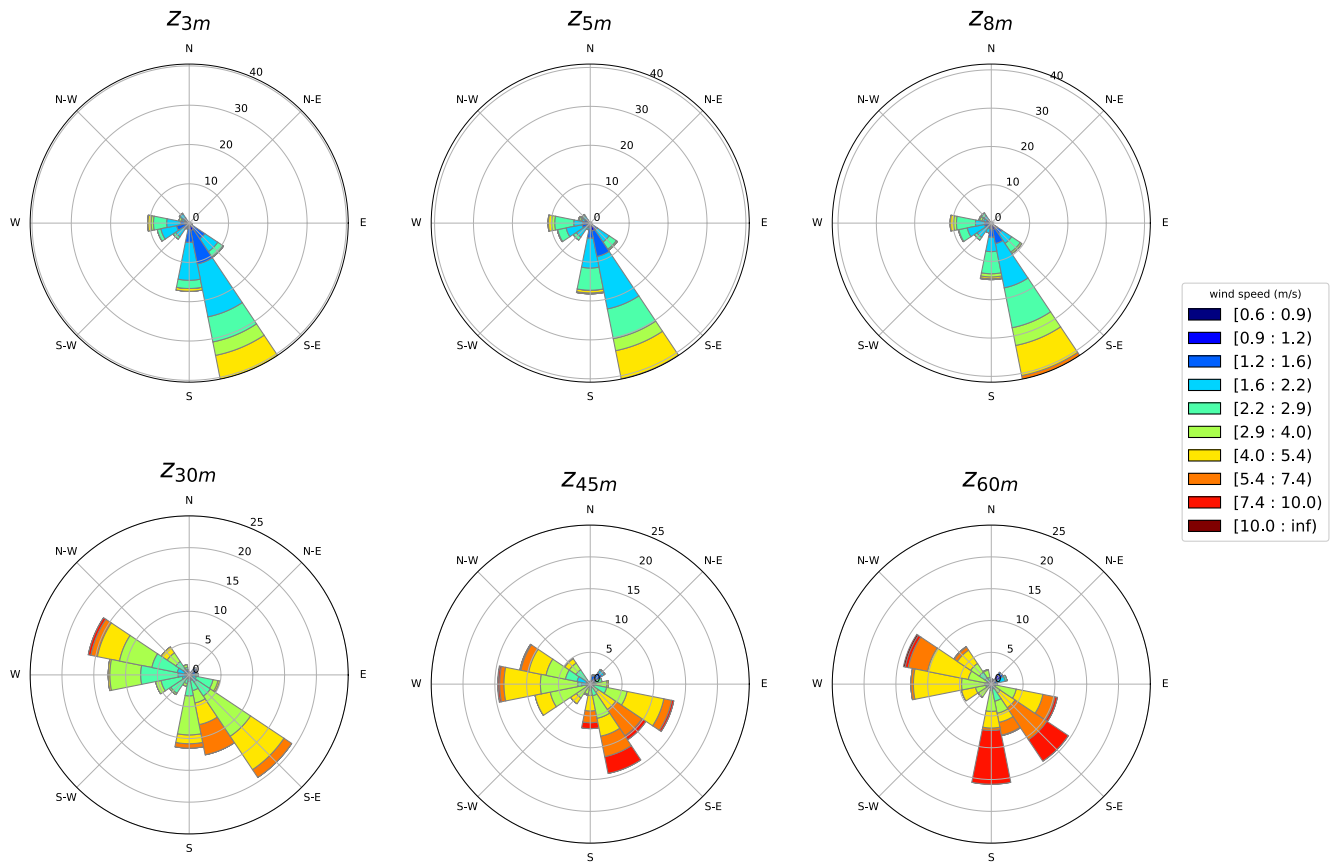

**Figure 3.** Night-time IOPs (nIOPs) wind roses for each level of the Skinfole mast (upper rows) and the Valimev tower (lower rows) during the BLLAST field campaign. Circles represent a 10% frequency increment for the Skinfole mast levels, and 5% for the Valimev tower levels.

As a consequence the north-west winds may prevail at high levels during nIOPs despite their anabatic origin.

Even though the main focus of this paper is the study of the HOST theory for the SBL, we also aim to study-analyse the behaviour of such theory for non nIOP conditions, and how the peculiarities of the Plateau de Lannemezan site affect its structure. Bearing this in mind we represent the wind rose for all the night-time-night-time set of data from the same levels of both towers (Fig. 4).

Night-time-whole-dataset-wind-roses-for-each-level-of-the-Skinfole-mast-and-the-Valimev-tower-during-the-BLLAST-field-campaign. Circles represent a 10% frequency-increment.

~~Winds from the west and west-northwest direction~~ One of the most relevant results for the Skinflow tower is the increasing frequency of winds coming from the westerly sector when all data is considered, unlike in nIOPs where westerly winds are almost negligible. The reason may be due to the fact that winds from the west and west-north-west direction, linked to larger-scale synoptic (Barneoud et al., 2010) flow, are very frequent in this part of Europe area, with additional channelizing to westerlies due to the mountain range at the south of the site. A frequency of 45% is found. The same result is observed for the Valimev tower dataset and 35% for the Skinflow mast. Its occurrence is mainly linked to larger-scale synoptic and mesoscale conditions (Barneoud et al., 2010). Southeast winds account for about 25%, although winds from the south-east sector become slightly less dominant. For both data sets, south-east is clearly predominant for the Skinflow tower heights versus Valimev, this is because the first one has measurements at very low levels and 35% of the flow for the Valimev and the Skinflow mast, respectively. Some of this SE flows are associated to SDFs (Jimenez and Cuxart, 2014), that are measured at the Skinflow mast and are typically eroded by the arrival of the deeper and larger scale MPF, measured at all the levels with an increase in wind speed and veering towards the southwest. This SW wind is largely associated to the scale of the Pyrenees, the MPF, and represents 20% of the flow for the lower levels and 15% for the higher ones. The difference between the higher and the lower levels wind directions distribution, Fig. 4, can be associated with the influence of therefore, for both datasets is able to measure small scale phenomena as SDF's which are generated by small scales as local slopes.

As we have seen throughout the flow characterization, the presence of shallow drainage flows, mountain plain flows, and the meteorological phenomena at different levels, the shallow drainage flows, mountain plain winds, and synoptic scale flows. Aura valley jet favours the formation of LLJ with maximum winds at different heights. In addition, taking into account the results of previous work done by Nilsson et al. (2016) who through the analysis of the Skinflow mast derived wind profiles during 10 IOP nights, showed that all of them, except one, displayed reverse wind gradient or non-monotonic wind profile with wind direction from about 120 to 180 degrees. Therefore, we can argue that LLJs are a frequent phenomenon in BLLAST campaign. An exhaustive study about the relation between LLJs and turbulent regimes is out of the scope of this paper. However, following Sun et al. (2012) two possibilities can be considered, summarized in the following explanation:

If we compare results from Fig. 3 and Fig. 4 we can clearly see the larger proportion of SE flows arriving to the site when the nIOPs are considered, whereas when the wind rose is referred to the whole BLLAST dataset, other directions, as W-NW increase its relevance. Indeed, this behaviour is even more pronounced for the Skinflow mast levels, where the western component for the nIOPs dataset is almost non-existent or very scarce

- a) The maximum wind of a LLJ is lower than the HOST threshold for its height above the ground, but the local shear below the LLJ is not negligible. Therefore moderate turbulence can be generated, diffusing downwards, especially when the vertical temperature gradient decreases with height. This situation leads to turbulence regime 3.
- b) The maximum wind of a LLJ is greater than the HOST threshold for its height above the ground. In that case, regime 2 occurs.

By this way, in addition to other processes, the occurrence of the different regimes can be linked to the presence of LLJs.

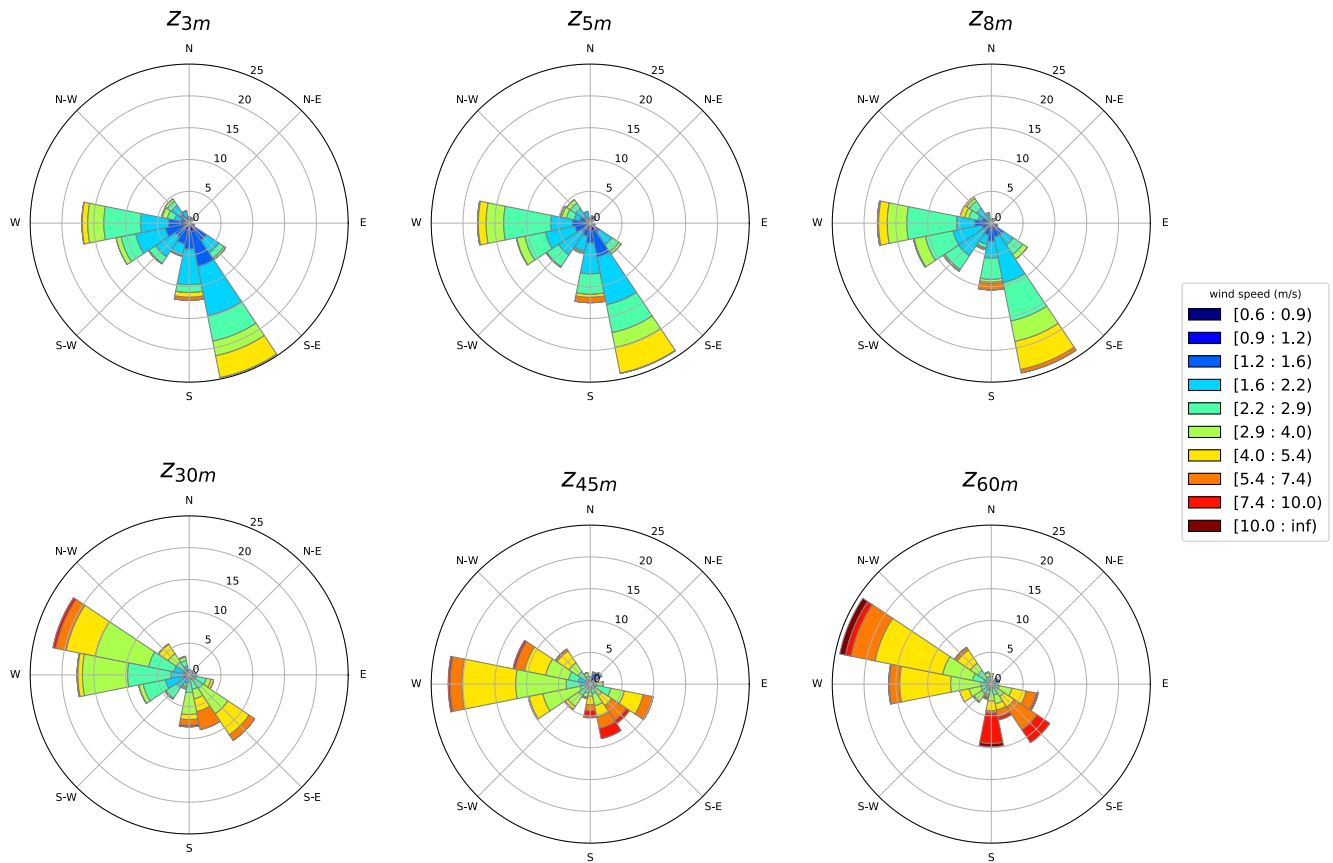

**Figure 4.** Night-time whole dataset wind roses for each level of the Skinfole mast (upper row) and the Valimev tower (lower row) during the BLLAST field campaign. Circles represent 5% frequency increments.

After having classified and illustrated the flow circulation from the dataset, we analyse the turbulence regimes from two different perspectives: using only nIOPS data (Sect. 4) and using the whole BLLAST dataset (Sect. 5).

#### 4 Turbulence regimes analysis: nIOPS

In this section we investigate the turbulence regimes using the data obtained from the so-called nIOPS in order to study the generality of the HOST pattern (Sun et al., 2012). We explore the dependence of the night-time turbulence intensity,  $V_{TKE}$ , with the horizontal wind speed  $V$  for each of the observational levels. ~~In addition, to deeper illustrate this relationship and its variability we use box plots over the measured levels. Finally we~~ We also analyse the  $V_{TKE}$  vs  $V$  relationship dependence on the thermal stratification through bulk virtual potential temperature differences between the Skinfole mast levels.

## 4.1 Turbulence relationship

Fig. 5a shows the relationship between  $V_{TKE}$  and  $V$ , where the wind speed threshold is marked for every level (see triangles in Fig. 5a). The turbulence intensity relationships with  $V$  for the nIOPs have a similar hockey stick shape as the one obtained by Sun et al. (2012, 2016) using data from CASES-99. As described schematically in Fig. 1, Fig. 5a shows that for a given height, below a wind speed threshold,  $V_T$ , the turbulence intensity does not depend on the wind speed with no actual increase of  $V_{TKE}$  (regime 1). On the contrary, above a given  $V_T$ ,  $V_{TKE}$  increases much more strongly than for lower wind speeds (regime 2). Table 3 shows the values of the wind speed thresholds obtained for the BLLAST field campaign during nIOPs. As observed by Sun et al. (2012) and Bonin et al. (2015), the wind speed threshold,  $V_T$ , (table-Table 3) also increases logarithmically with height in the BLLAST site during the nIOPs and the  $r^2$  correlation between the logarithmic height and the wind speed is around 0.92. The threshold value marks a change in the slope of the turbulence intensity relationship. Therefore, we consider that the regime changes to regime 2, when the slope has increased at least by two times the value of the slope of regime 1. The higher the layer, i.e. the deeper the stratus below  $z$ , the greater the value of  $V$  required for the layer to become neutral. Therefore, the  $V_T$  increases with height because larger shear production is needed to compensate for the inhibiting effect that near-surface stable stratification has on TKE. The  $V_T$  values for nIOPs in BLLAST are lower than those obtained by Sun et al. (2012) for CASES-99 and the bulk shear ( $V_T/z$ ) is weaker as well (Fig. 5b). This can be explained by the effect of a larger roughness length in the BLLAST site, associated with the mountainous terrain south of the site. The greater the roughness length, the smaller the  $V_T$ , which means that weaker wind is necessary to achieve regime 2, as also seen by Mahrt et al. (2013).

It is also noticeable that the slope for the regime 2 for all the levels is quite similar, which indicates that, as expected, once the layer is neutral, the relationship between the turbulence intensity and the wind speed tends to be independent of the layer depth. Although the three turbulent regimes of the HOST pattern are visible in-at all levels, in-the higher-at the highest level,  $z_{60m}$ , the regime 2 does not seem to behave as expected for the greatest values of the wind speed, showing a decrease in the turbulence intensity as the  $V$  increases. ~~After comparing the evolution of the main magnitudes at different levels, a possible explanation is that the higher level is often decoupled from the layers below, and could possibly be located above the top of the SBL. However, the relatively small number of points at these velocities may not be enough to get representative results. This is~~ due to the small amount of data for these wind speed bins, therefore no statistical conclusion can be drawn from it.

**Table 3.** Wind speed thresholds  $V_T$  for the Skinflow mast and Valimev tower levels for the BLLAST field campaign.

|                            | $z_{3m}$ | $z_{5m}$ | $z_{8m}$ | $z_{30m}$ | $z_{45m}$ | $z_{60m}$ |
|----------------------------|----------|----------|----------|-----------|-----------|-----------|
| $V_T$ (m s <sup>-1</sup> ) | 1.3      | 1.7      | 2.1      | 3.7       | 6.1       | 6.9       |

The relationships of  $\sigma_V$  and  $\sigma_W$  with  $V$  (not shown) also present the HOST dependence seen for  $V_{TKE}$ . However, the turbulence values are generally smaller for  $\sigma_W$  with a smaller increase of the vertical variance with increasing  $V$  in regime 2 due to the ground impingement as found in Sun et al. (2012).

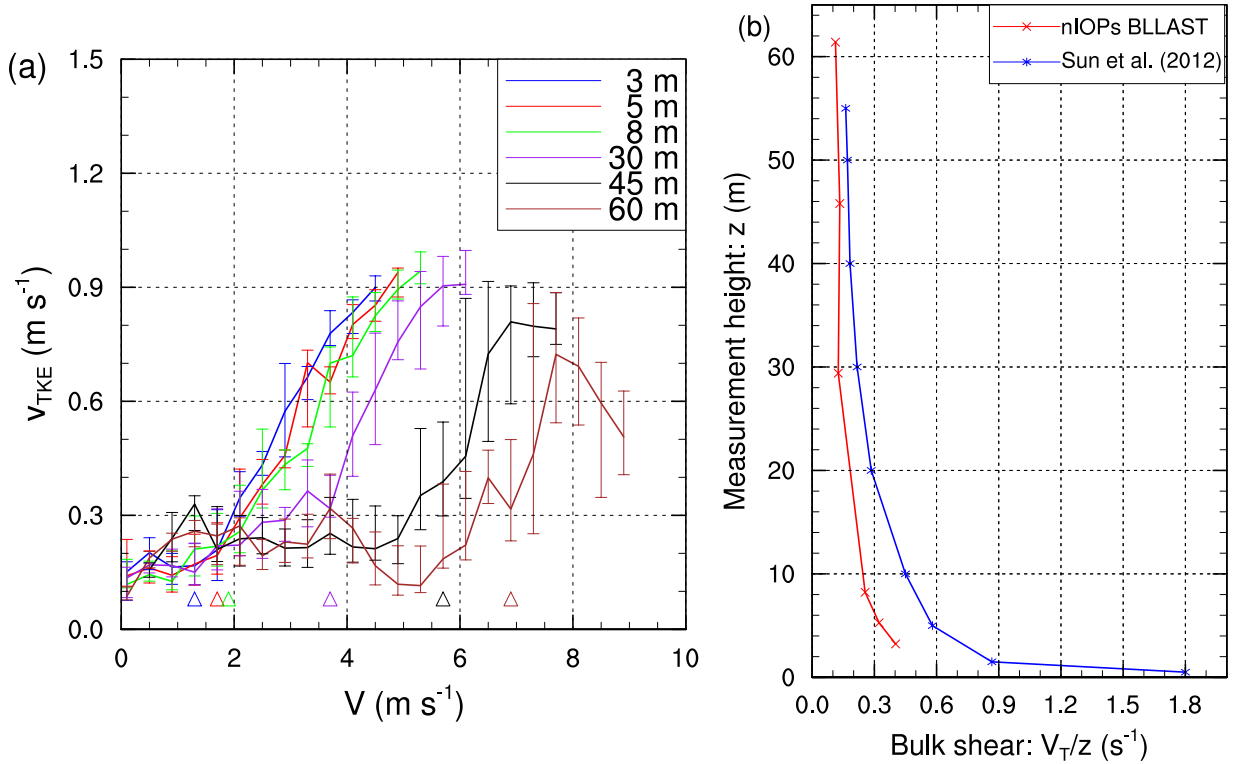

**Figure 5.** (a) Relationship between the bin-averaged turbulence intensity  $V_{TKE}$  and the wind speed  $V$  for the nIOPs of the BLLAST campaign. The lines join the median value of each  $V$  bin ( $0.4 m s^{-1}$  bins) for each level of measurement. The vertical lines of each bin mark the first and third quartiles with lower and upper end, respectively. The wind speed threshold  $V_T$  is marked with a coloured triangle for each coloured level. (b) Bulk shear variation with height obtained with BLLAST nIOPs data (red line) compared with CASES99 data reported by Sun et al. 2012 (blue line).

#### 4.1 Box-plots analysis

In order to further understand the turbulence behaviour during the nIOPs, we illustrate the relationship between  $V_{TKE}$  and  $V$  using the box-plots for each of the measured levels. This technique is only useful if the number of points for each of the boxes is large enough, otherwise the result may be senseless, therefore we only represent the box if the number of measurements falling within the bin is more than a minimum of 5. The method is a simple form to represent several simple statistics, such as the minimum and the maximum, the lower and upper quartiles and the median in a visual display.

Each box for each bin contains the data between the first ( $Q1$ ) and the third quartile ( $Q3$ ), called interquartile range ( $IQR$ ), with the median within. The marks representing the values of  $Q1 - 1.5 \cdot IQR$  and  $Q3 + 1.5 \cdot IQR$  correspond to the lower and the upper whiskers respectively, unless the maximum (minimum) value is lower (higher) than those values. The outliers are those points falling outside of the whiskers. The amplitude of the box, i.e. the  $IQR$ , depends on the dispersion of the points

within the bin, if  $V_{TKE}$  varies considerably for a given value of  $V$ , then the box will be larger. The whiskers represent how far the dispersion of  $V_{TKE}$  values are from the median. The point distribution is not Gaussian for each bin and the whiskers reach further values above than below the median. This skewness is due to the non-existence of negative values and the fact that the turbulence intensity can be enhanced due to the presence of coherent structures. The quantity of outliers indicates the presence of turbulent events that lead to an increase in the turbulent intensity that differs greatly from the value expected for a given range of  $V$ . This situation corresponds to regime 3 characterised by intermittent turbulence phenomena, which is typical for clear and calm nights.

Figure A1 shows that most of the boxes have an IQR relatively small for the regime 1, whilst for the regime 2 the dispersion increases, this is appreciated even more for the levels between  $z_{8m}$  and  $z_{60m}$  (Fig. A1c, A1d, A1e, A1f). Not only the IQR shows the dispersion of the points for a certain bin, but the whiskers, as well as the outliers, provide additional information. The number of outliers within regime 3 is larger for wind speeds below the threshold, since the variability of the turbulence is higher. Instead, the strong wind associated to neutral stratification tends to suppress the occurrence of regime 3. It can be noted that for wind speeds closer to the threshold the scatter increases (Fig. A1), which is highly due to the bin-averaged technique and the fact that around this velocity the turbulence intensity increases quicker. The increase in scattering is observed in the IQR values, i.e. the larger length of the boxes, and in the greater amount of outliers.

There is a big difference in Fig. A1 in the shape and in the characteristics of the box plots corresponding to the Skinflow mast and the Valimev tower. Fig. A1a, A1b and A1c show the same pattern, with very similar IQR for  $V < V_T$ , where the scattering increases for the bins around the wind speed threshold. In addition, the scattering also increases with a greater number of outliers at higher levels (Fig. A1e and A1f).

Box plots of the relationship between the bin-averaged turbulence strength  $V_{TKE}$  and the wind speed  $V$  for the nIOPs of the BLLAST field campaign. Data correspond to the Skinflow mast and to the Valimev tower at different heights, (a)  $z_{3m}$ , (b)  $z_{5m}$  and (c)  $z_{8m}$  Skinflow mast levels, and (d)  $z_{30m}$ , (e)  $z_{45m}$  and (f)  $z_{60m}$  Valimev tower levels.

#### 4.1 Turbulence regimes and thermal stratification

As turbulent mixing is influenced by the vertical temperature gradients, we now consider the effect of stratification on the turbulence relationship. We only proceed for the Skinflow mast because the separation of the measurements layers levels in the Valimev tower are too deep to calculate the stratification based on the bulk potential temperature difference,  $\Delta\bar{\theta}_v$  (Sun et al., 2016). Herein  $\Delta\bar{\theta}_v$  is defined as  $\Delta\bar{\theta}_v = \bar{\theta}_v(z) - \bar{\theta}_{v_{z_0}}$ , where  $\bar{\theta}_{v_{z_0}}$  is the virtual potential temperature of reference at  $z_{2m}$ , and  $\bar{\theta}_v(z)$  the virtual potential temperature at each height  $z$ . An alternative approach to calculate the stratification conditions could be to use the thermal gradient instead. However, throughout the paper we have considered the bulk potential temperature difference method described in Sun et al. (2016), which also provides good results and allows for a more consistent comparison within the Hockey-Stick theory framework.

In Fig. 6 we observe that for wind speeds greater than the threshold,  $V > V_T$ , the shear is strong enough to generate eddies with scale  $z$ , leading to a boundary layer neutrally stratified with a potential vertical temperature difference close to zero (green line). At all levels (Fig. 6 a, b, c) for wind speeds below the threshold, the stratification of the night-time boundary layer

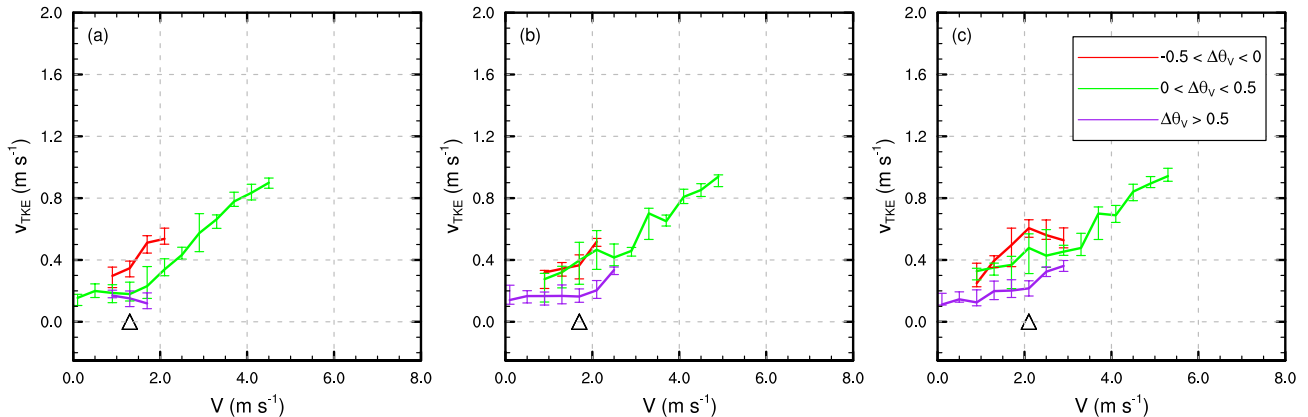

**Figure 6.** Relationship between the bin-averaged turbulence strength  $V_{TKE}$  and the wind speed  $V$  during the BLLAST campaign nIOPs as a function of potential temperature difference intervals, defined as,  $\Delta\bar{\theta}_v = \bar{\theta}_v(z) - \bar{\theta}_{v_{z_0}}$ , where  $\bar{\theta}_{v_{z_0}}$  is the virtual potential temperature of reference at 2 m a.g.l., and  $\bar{\theta}_v(z)$  the virtual potential temperature at each height  $z$ : (a)  $z_{3m}$ , (b)  $z_{5m}$ , and (c)  $z_{8m}$ . The wind speed threshold  $V_T$  is marked with a black triangle for each height (a)  $z_{3m}$ , (b)  $z_{5m}$ , and (c)  $z_{8m}$ .

becomes stable, so there is a shallow mixing layer with a depth determined by  $\delta z < z$  (Sun et al., 2012). Therefore turbulent eddies do not reach the surface and cold air is accumulated near the surface, resulting in layers with values of  $\Delta\bar{\theta}_v > 0.5$  K. However, in Fig. 6 we observe situations that deviate from those described above. For example, in regime 1, for very stable situations ( $\Delta\bar{\theta}_v > 0.5$  K), intermittent turbulence between regimes 1 and 2, and between regimes 1 and 3, can occur. Note that

5 these transitions increase the turbulence, giving rise to temperature variations and mixing that would result in a near neutral or even unstable regime (see green and red lines in Fig. 6).

For  $V > V_T$  the turbulent mixing processes tend to decrease the variability of  $\Delta\bar{\theta}_v$  (Sun et al., 2016) and the stratification becomes near neutral. As it is expected, for  $V < V_T$ , the magnitude of the turbulence intensity,  $V_{TKE}$ , increases with decreasing values of  $\Delta\bar{\theta}_v$ , as the relevance of TPE decreases with instability (Sun et al., 2016; Zilitinkevich et al., 2007) (Zilitinkevich et al., 2007; Sun

10 Another important point to consider is the thickness of the layer, as  $\Delta\bar{\theta}_v$  represents a vertically integrated virtual potential temperature difference, thus it will increase when the height of the level increases (Fig. 6 a, b, c). Therefore, due to the proximity between the  $z_{3m}$  and  $z_{2m}$  levels most of the points fall into the stable-neutral stratification  $0 \text{ K} < \Delta\bar{\theta}_v < 0.5 \text{ K}$ , which explains the predominance of the green line in Fig. 6a. For the  $z_{5m}$  and  $z_{8m}$  levels the amount of bins with larger values of  $\Delta\bar{\theta}_v$  increases, as a consequence of being further up from the reference level.

## 15 5 Turbulence regimes analysis: whole BLLAST dataset

Herein we aim to explore how well the HOST behaves when we use all the night-time dataset from the BLLAST field campaign without any restriction. To achieve this objective, we ~~did the same type of analysis as before~~ have done an analysis similar to the

one followed in Sect. 4; we first analysed the turbulence relationship, then perform a deeper analysis using box plots for each measurement level, and finally examined turbulence relationships with the thermal stratification. Therefore, the first step is to analyse the differences between all the night-time data wind roses (Fig. 4) and those corresponding to nIOPs (Fig. 3). As we have seen in Sect. 3 the most remarkable feature is the high frequency of the western flows when the whole nocturnal dataset is considered. Taking into account that many storms and frontal systems were from this direction (Barneoud et al., 2010), the analysis is done splitting the data between two sets of wind directions: the first group includes winds coming from directions ranging from  $235^\circ$  to  $45^\circ$ , referred as NW's, including southwest to west, northwest, north and northeast directions; the second group includes the remaining directions, from  $45^\circ$  to  $235^\circ$  referred as SE's, including northeast to east, southeast, south and southwest directions, which are mostly due to the local topographic effects (Sect. 3).

## 10 5.1 Turbulence relationships

As in Sect. ~~??~~4, we analyse the turbulence intensity relationships, but herein we focus on the whole night-time dataset without differentiating the fair weather nights to the non-fair weather nights. The analysis is done splitting the data into two main directions, flows coming from the NW's and the SE's directions (Fig. 7). For the NW's winds the relationship between the  $V_{TKE}$  with  $V$  is linear, so the HOST pattern cannot be appreciated (Fig. 7a). Contrary to this, for the SE's directions the  $V_{TKE}$  vs  $V$  does resemble to a hockey stick and we can distinguish a  $V_T$  for each height (Fig. 7b), which is similar to those found for the nIOPs but not equal, as the dataset herein includes all the night-time data. In fact, most of the SE's situations correspond to nIOPs (between a 63% and a 70% of them), so the hockey shape reproduced in Fig. 7b is very similar to that shown in Fig. 5. Indeed, this plot corresponds mostly to fair weather nights when stably stratified and near-neutral stratifications occurred and both regimes (regimes 1 and 2) could be distinguished. In contrast, situations corresponding to NW's are tied to frontal systems, cloud skies or cyclonic situations, which substantially modify the boundary layer ideal structure. Specifically, in these situations the surface may not have been warmed much during the day so nocturnal cooling effects were much more limited, then, the low-wind speed region of the HOST pattern is rarely reached and therefore regime 1 is not well illustrated in the  $V_{TKE}$  vs  $V$  relationship. For the NW's wind directions, the turbulence seems to be mainly driven by bulk shear, and the HOST turbulence intensity relationship may not be valid in those cases.

## 25 5.2 Box plots analysis

~~The box plot representation details are the same as previously explained.~~ In order to further understand the turbulence behaviour, we illustrate the relationship between  $V_{TKE}$  and  $V$  using the box plots for each of the measured levels and wind speed bins as described in Sect. ??-In this case, as-2. To ensure representativeness of the box plots a minimum of six measurements for each bin is required. The method is a simple form to represent several simple statistics, such as the minimum and the maximum, the lower and upper quartiles and the median in a visual display. The amplitude of the box, i.e. the IQR, depends on the dispersion of the points within the bin, if  $V_{TKE}$  varies considerably for a given value of  $V$ , then the box will be larger. The whiskers length is proportional to the dispersion of  $V_{TKE}$ .



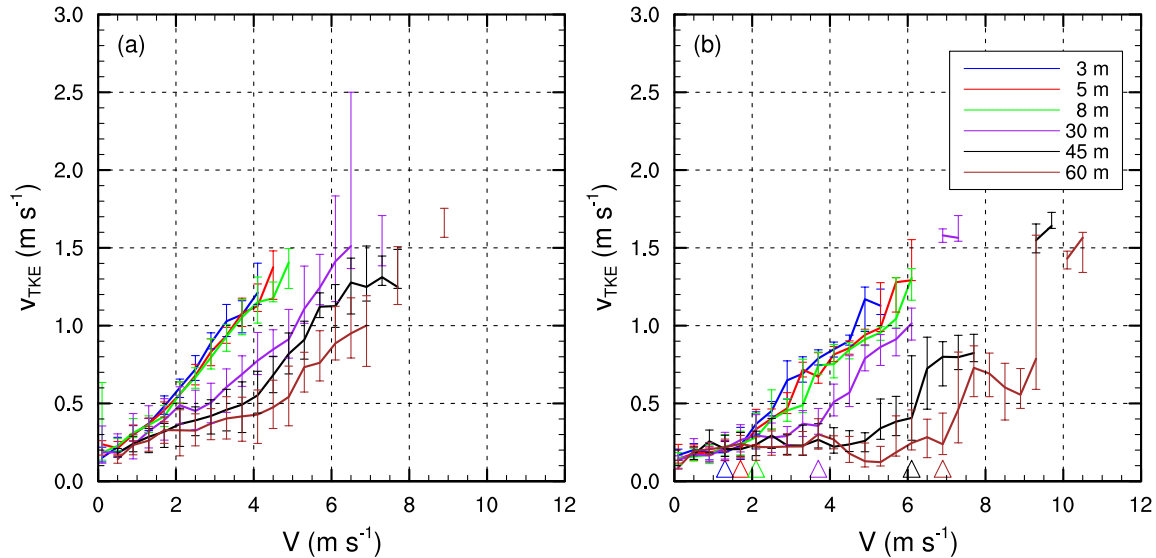

**Figure 7.** Relationships between the bin-averaged turbulence strength  $V_{TKE}$  and the wind speed  $V$  for the whole BLLAST field campaign for the main considered directions: (a) wind coming from  $225^\circ$  to  $45^\circ$  (included), named NW's, and (b) winds coming from  $45^\circ$  to  $225^\circ$  (included), named SE's. Each line represents the median within each  $0.4 \text{ m s}^{-1}$   $V$  bin. The vertical lines represent the deviation for each  $V$  bin with the low limit corresponding to Q1 and the upper limit to Q3. The threshold wind speed  $V_T$  is marked with a triangle with the heights colours in (b).

As can be seen in Fig. 8, Fig. 9 and Fig. A1 the  $V_{TKE}$  data distribution for each bin is not Gaussian and the upper whiskers are generally longer than the lower ones. This skewness is due to the data do not correspond only to fair weather conditions; the amount of outliers and the whisker length, especially for higher levels, is considerably greater than for the nIOP situations (Fig. 8 and 9 vs Fig. A1). For this reason, we non-existence of negative values and the fact that the turbulence intensity can be enhanced due to the presence of coherent structures, typical in regime 1 and transitioning to regime 3, i.e. for  $V < V_{TKE}$ . The quantity of outliers indicates the presence of turbulent events leading to an increase in the turbulent intensity which differs greatly from the value expected for a given range of  $V$ . This situation corresponds to regime 3 characterised by intermittent turbulence phenomena, which is typical for clear and calm nights.

The number of outliers within regime 3 is higher for wind speeds below the threshold, since the variability of the turbulence is higher. Instead, the strong wind associated with neutral stratification tends to suppress the occurrence of regime 3. It can be noted that for wind speeds closer to the threshold the scatter increases (Figs. 8d, 8e, 8f, 9d, 9e, 9f), which is due to the bin-averaged technique and the fact that around this velocity the turbulence intensity increases more quickly. The increase in scattering is observed in the IQR values, i.e. the larger length of the boxes, and in the greater amount of outliers.

We further examine the turbulence relationships separately for lower (Skinflow mast) and higher levels (Valimev tower).

Thereafter we apply two extra conditions to distinguish the reason why the turbulence intensity might have been higher or

lower is higher than expected. These points are outliers which have a very high  $V_{TKE}$  value, due to a quick change of the horizontal wind speed,  $\sim 1 \text{ m s}^{-1}$ , between consecutive measurements (green crosses in Figs. 8 and 9) or to a shift in the wind direction of more than  $\sim 75^\circ$  between consecutive measurements (red asterisks in Figs. 8 and 9). These points represent enhanced turbulence intensity for a certain period, temporal average of 5 minutes, due to either wind speed shear or directional shear (Mahrt et al., 2013). Black dots are outliers not attributed to any of these shears, typical of regime 3, associated with top-down turbulent events.

In the following subsections we discuss the box plots for the Skinfow mast levels that are represented in Fig. 8 and the box plots for the Valimev tower levels in Fig. 9.

### 5.2.1 Skinfow mast levels

As seen in subsection 5.1, it is not expected that the relationship between  $V_{TKE}$  and  $V$  for the NW's directions will behave as the HOST predicts (Fig. 7), therefore, for these directions, a similar behaviour is seen for  $z_{3m}$  (Fig. 8a),  $z_{5m}$  (Fig. 8b) and  $z_{8m}$  (Fig. 8c) levels, where the turbulence strength increases near-linearly with  $V$ , and the first regime is not present. The whisker length is small except for lower and higher wind speeds at  $z_{8m}$ , hence the dispersion is low and most of the points are close to the median, so that the resulting relationship is fairly linear. ~~There are few outliers in  $z_{3m}$  and  $z_{5m}$  since the surface smooths the quick shifts of wind speed and direction (?). The number of outliers increases at  $z_{8m}$ , many of them caused by wind speed and direction shear (green crosses and red asterisks).~~

For the thermally driven flows the HOST pattern is clearly identified following both the whiskers and the median values of Fig. 8 d, e, f. There is also a large amount of enhanced turbulence points at all levels triggered mostly by wind speed and directional shear. In addition, for regime 1, there is a large amount of black outliers close to the whiskers that can be related to regime 3, as top-down turbulent events associated ~~to~~ with orographic effects are expected to occur from this direction. The IQR range tends to be small except for higher wind speeds, and the whiskers tend to be relatively close to the median. However, for wind speeds close to  $V_T$  the boxes and whiskers are longer, as the corresponding bin-averaged velocity includes turbulence intensities corresponding to the two different turbulence regimes, 1 and 2, with the later having greater  $V_{TKE}$  than the former.

When comparing the SE's box plots (Figs. 8d, 8e, 8f) with the nIOP box plots (Figs. A1a, A1b, A1c in the Appendix), the amount of outliers and the whisker length is considerably greater than for the nIOP situations. This large amount of outliers present in the SE's directions (Fig. 8d, ~~e,~~ 8e, 8f) is a remarkable difference from what was observed in Sun et al. (2012) and in the nIOPs box plot analysis (Fig. A1), where little dispersion was found for each  $V$  bin. This increase in the dispersion of the turbulence intensity values for a fixed  $V$  may be associated ~~to~~ with the topography influence and ~~to~~ specially with the weather conditions (synoptic scale), revealing an increase in the amount of non-stationary flows. While CASES-99 was located in a nearly flat terrain, BLLAST is a highly topographically influenced area, where, in addition, the presence of storms and low pressure systems affecting the region is common.

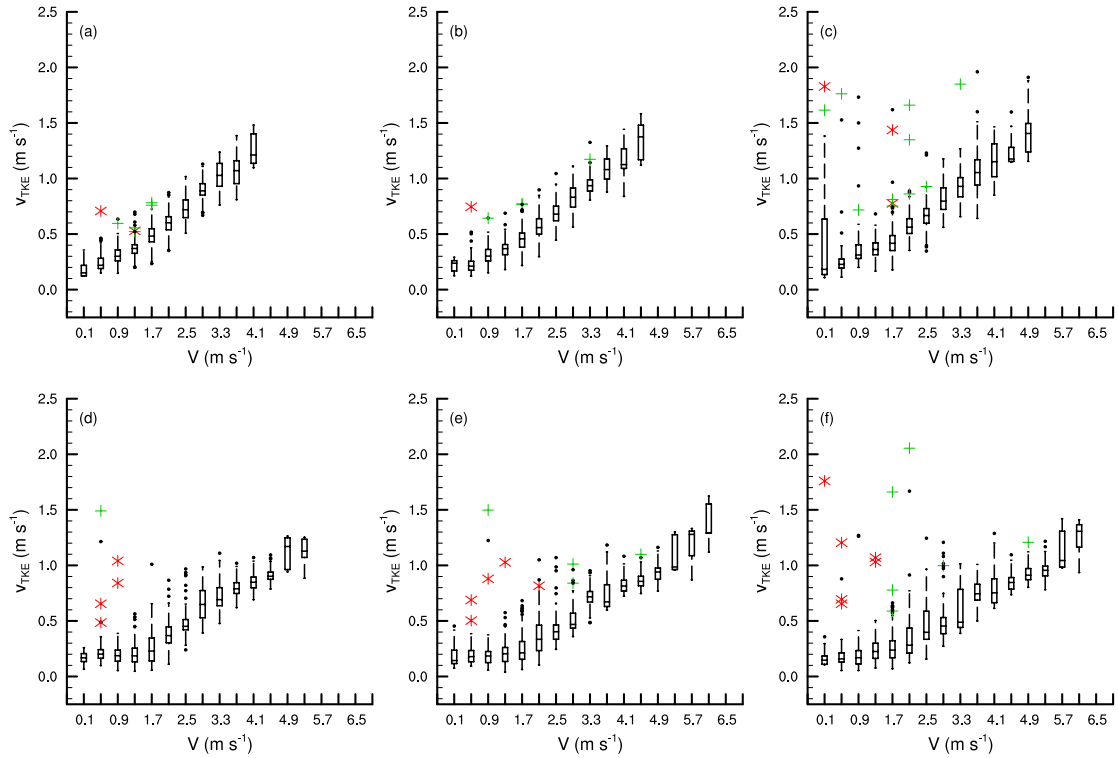

**Figure 8.** Box-plot Box plots of the relationship between the bin-averaged turbulence strength  $V_{TKE}$  and the wind speed  $V$  for the Skinfow night-time dataset for the whole BLLAST field campaign. The maximum whisker length is proportional to 1.5 times the third and first quartile difference, or inter-quartile range ( $1.5 \cdot IQR$ ). The top row figures-panels correspond to the NW's direction range for (a) NW's at  $z_{3m}$ , (b) NW's at  $z_{5m}$ , and (c) NW's at  $z_{8m}$  and the bottom row corresponds to the SE's directions, (d) SE's at  $z_{3m}$ , (e) SE's at  $z_{5m}$  and (f) SE's at  $z_{8m}$ . The outliers represent a turbulence enhancement due to a quick variation of the wind speed (greater than  $1 \text{ m s}^{-1}$ ) (green crosses), due to a sharp change in the wind direction (greater than  $75^\circ$ ) (red asterisks) or due to any other factor (black dots).

### 5.2.2 Valimev tower levels

For the Valimev tower we have made the same study as before, taking also into account the same main wind directions, NW's and SE's. One of the main results is related to both the IQR range and the whiskers length, for NW's and SE's, they both increase with the height of the measurement, indicating a wide variety of turbulence intensity cases (Fig. 9).

- 5 Similarly as in the Skinfow levels, the HOST pattern for the NW's directions cannot be appreciated, whilst for the SE's the turbulence intensity does follow the HOST pattern. For regime 1 in SE's (Fig. 9 d, e, f), even though the boxes are small, there is a great number of outliers, many of them very close to the whiskers which would be-corresponding-correspond to regime 3. Turbulence enhancement due to wind speed shear dominates over wind directional shear at these levels. Many other outliers

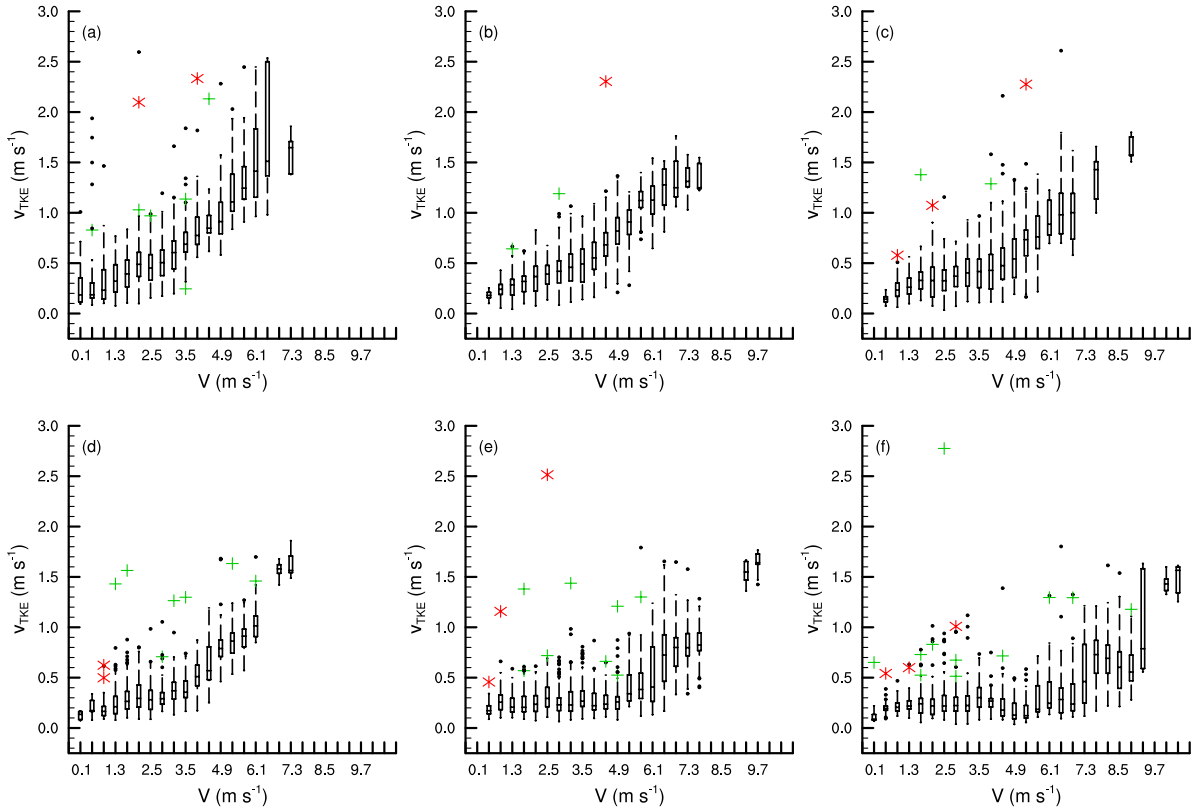

**Figure 9.** Box plots of the relationship between the bin-averaged turbulence strength  $V_{TKE}$  and the wind speed  $V$ . As Fig. 8 but for the Valimev dataset for the whole BLLAST field campaign. Top row figures panels correspond to the NW's direction range for (a) NW's at  $z_{30m}$ , (b) NW's at  $z_{45m}$ , and (c) NW's at  $z_{60m}$  and the bottom row corresponds to the SE's directions, (d) SE's at  $z_{30m}$ , (e) SE's at  $z_{45m}$  and (f) SE's at  $z_{60m}$ . The outliers represent a turbulence enhancement due to a quick variation of the wind speed ( $\Delta V > 1 \text{ m s}^{-1}$ ) (green crosses), due to a sharp change in the wind direction ( $\Delta dir > 75^\circ$ ) (red asterisks) or due to any other factor (black dots).

(black dots) close to the whiskers in regime 1 are identified as top-down turbulent events (e.g. Kelvin- Helmholtz instabilities, gravity waves or other intermittent turbulence events).

Similar to what was observed for the Skinfow mast levels, the comparison between the SE's box plots (Figs. 9d, 9e, 9f) and the nIOPs box plots (Figs. A1d, A1e, A1f in the Appendix), Valimev tower levels show a greater amount of outliers and a larger whisker length for the SE's box plots, which may be also linked to the topography influence and to the meteorological synoptic conditions.

5

Overall, for high wind speeds the bin average method does not give good results, as the number of data is not significant enough, hence some absent bins, despite this the trend of due to the lack of data, some box plots are not available, however the regime 2 pattern can be observed. The bins above and below wind speed bins with values close to the  $V_T$  also show greater

~~boxes and whiskers~~ show greater dispersion (Fig. 8, Fig. 8 and Fig. A1) than the rest, indicating the inherent uncertainty in determining the ~~real-observed~~  $V_T$  value.

### 5.3 Turbulence regimes and thermal stratification

To further understand the HOST pattern, as previously done in Sect. ??4 for the nIOPs, we explore the ~~virtual-potential~~ ~~temperature-gradients-dependence-of~~ effect of stratification on the turbulence relationship for the whole BLLAST dataset. We also separate the data depending on the two wind directions considered, NW's (Fig. 10a) and SE's (Fig. 10b). We only use data from the Skinfoam mast, and because ~~of the results among~~ the results for the different levels,  $z_{3m}$ ,  $z_{5m}$ ,  $z_{8m}$  ~~is-are~~ very similar, we only do the analysis and the discussion for the  $z_{5m}$  level.

For the NW's flows (Fig. 10a), turbulent mixing leads to a neutral stratification (red and green lines) and also to unstable stratification (turquoise lines), indicating thermal instability in the flow. Stable stratification (purple line) only appears associated ~~to-with~~ very low velocities and with relatively large  $V_{TKE}$  values. Therefore, the linear turbulence relationship is independent of the temperature gradients. Turbulence is driven by bulk shear, therefore the flow incoming from this direction is such that even for lower wind speeds it carries turbulence, i.e. large eddies, that produce similar  $V_{TKE}$  independently of the temperature gradient and of the stratification of the nocturnal ~~BLABL~~.

For the thermally driven flows (Fig. 10b) the behaviour of the turbulence intensity versus the wind speed depending on  $\Delta\bar{\theta}_v$  is analogous to that found for the nIOPs (Sect. ??4). Regime 1 is mostly associated with strong positive temperature gradients (purple lines) while near-neutral (green line) and unstable (red line) stratification is characteristic of regime 2 and 3. Indeed, the characteristic events of regime 3, can overturn the typical nocturnal positive temperature gradients.

## 6 Transition between regimes and turbulence intermittency

Associated with the transition ~~between-among~~ the three turbulence regimes, Sun et al. (2012) defined three turbulent intermittency categories: A, B and C (Fig. 1). Category A corresponds to the transition between regime 1 and regime 2, and vice versa, the wind speed oscillates between both regimes generating intermittent turbulence. Category B corresponds to the enhancement of turbulence within the regime 1 caused by atmospheric disturbances as internal gravity wave, density currents, and low-level jets (LLJs), that increases local turbulence and may reduce the local stability, even inducing some intermittency. Category C refers to top-down turbulent events or upside-down boundary layers that enhance downward turbulence into a stable environment, generating regime 3. Since the HOST theory and the related intermittency categories were defined for the SBL, here we only consider the nIOPs and we illustrate the previous categories selecting appropriate examples.

### 6.1 Turbulence intermittency: Categories A & B

During the BLLAST field campaign the occurrence of ~~katabatic winds coming from the south valleys was quite common~~. ~~3-~~ They winds influenced by the complex orography at the south of the site was common (Fig. 3). At this site, they are usually generated after the near calm situation of the evening transition, first as shallow drainage flows ~~which later are broken~~, and then

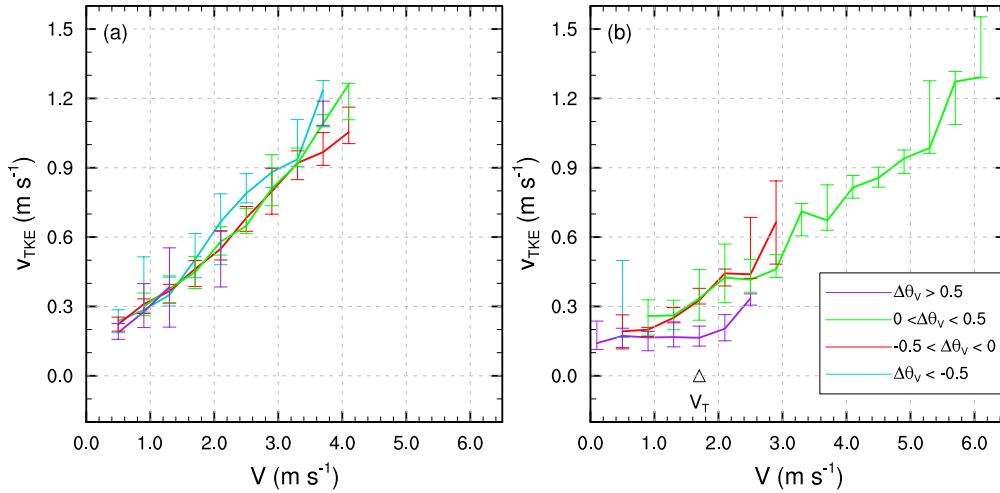

**Figure 10.** Relationship between the bin-averaged turbulence strength  $V_{TKE}$  and the wind speed  $V$  during the BLLAST campaign nIOPs as a function of potential temperature difference intervals, defined as,  $\Delta\bar{\theta}_v = \bar{\theta}_v(z) - \bar{\theta}_{vz_0}$ , where  $\bar{\theta}_{vz_0}$  is the virtual potential temperature of reference at 2 m a.g.l., and  $\bar{\theta}_v(z)$  the virtual potential temperature at the height of  $z_{5m}$  for: (a) NW's direction range and (b) SE's direction range. The wind speed threshold  $V_T$  for  $z_{5m}$  is marked with a black triangle in (b).

interrupted by the arrival of a larger and deeper mountain-plain flow with greater values of  $V$  (Román-Cascón et al., 2015) (Román-Cascón et

The transition between them can cause wind speed oscillations between regime 1 and 2, and shallow wind oscillations within regime 1 leading to turbulence intermittency of category A and B respectively. During the BLLAST field campaign both type of transitions are detected, either by the Valimev tower or by both the Valimev and the Skinflow levels. In almost every nIOP one of the different ways of achieving this category of turbulence intermittency is observed. For this study we select the period between 1900 UTC and 2200 UTC during the night of the 2nd of July of 2011 (nIOP09) (Román-Cascón et al., 2015), as it represents better the intermittency of both of these categories, as shown in (Fig. 11). The categories can also be found during other nIOPs. Category A can be found in all the nIOP cases but nIOP10. Category B is not so frequent, occurring for short periods during the nIOPs 01, 02, 03, 04, 05, 07, 09.

10 The 2nd of July of 2011 (IOP10) was characterised by an anticyclonic situation over the south of France, leading to weak surface gradients and to near calm conditions close to the surface at the evening time. Thus, at 1900 UTC the wind speed values are around  $0.5 \text{ m s}^{-1}$  (Fig. 11a). This situation is, according to Román-Cascón et al. (2015), the foremost scenario for "the appearance of SDFs with a marked SSE-SE component, where stronger winds were encountered at lower levels with maxima close to the surface (around 2-3 m above ground) and the wind intensity decreasing with height above the maximum". This is the picture of a slight SDF flowing through the nearby gully (Román-Cascón et al., 2015; Nauta, 2013) (Nauta, 2013; Román-Cascón et al., 2015) mea  
15 by the Skinflow mast and the Valimev towers, although in Fig. 11 only the  $z_{30m}$  level of Valimev tower is shown, for better clarity. The arrival of this SDF promotes the establishment of a surface temperature inversion (Fig. 11b), with a larger decrease

in temperature at the lowest levels. The SDF stage ends around 2025UTC with the arrival of a stronger and deeper wind (Fig. 11a) from the southeast, and the MPF stage starts. This increase in wind is more noticeable at high levels, leading to the breaking of the SDF and the potential virtual potential temperature homogenisation (Fig.11b).

As Román-Cascón et al. (2015) showed, two different gravity wave events occurred during the SDF stage and the arrival of the MPF. Both events are examples of turbulence intermittency categories. The first one corresponds to a wave of almost four cycles with a 20-25 min period between 19:00 and 2025 UTC approximately. This is an example of category B of turbulence intermittency, as the oscillations in wind speed occur for wind speeds below the threshold of each level (see the  $V_T$  for each height marked with a coloured horizontal dashed line in Fig. 11a), within regime 1. The turbulence can be seen clearly for  $z_{2m}$ ,  $z_{3m}$ ,  $z_{5m}$  and  $z_{30m}$  (see ~~arrow-eat-~~Bcategory B (“Cat. B” arrow in Fig. 11a). Román-Cascón et al. (2015) states that the second event "is characterised by several wind speed oscillations of shorter periods with two notable cycles of greater amplitude from 2030 to 2130 UTC". The wind speed oscillates around the threshold, as an example of category A. There is a transition from regime 1 to 2 and viceversa at  $z_{3m}$ ,  $z_{5m}$ ,  $z_{8m}$  and  $z_{30m}$  (see ~~arrow-eat-~~Acategory A “Cat. A” in Fig. 11a). In addition, when the wind speed is above the threshold, the virtual potential temperature vertical gradients are reduced (Fig. 11b), as it is expected in regime 2.

## 6.2 Turbulence intermittency: Category C

Category C turbulence intermittency refers to the transition between regimes 1 and 3 in the HOST model (Fig. 1). It is originated in very stable boundary layers when the main source of turbulence is elevated, and is temporally detached from the surface but intermittently coupled to the surface generating bursts of downward turbulence (Blumen et al., 2001). The origin of this elevated turbulence can be related to the presence of Kelvin-Helmholtz instabilities, density currents, gravity waves, low level jets or any other meteorological phenomena that can induce turbulence intermittency ~~-(Mahrt, 2014; Udina et al., 2013; Ferreres et al., 2013; Soler et~~

Usually, ~~Cat-~~category C turbulence intermittency is characterised by a decrease of  $V$ , an increase in the variability of  $w$  with height, and negative values of the skewness  $S$  ~~-(Sun et al., 2012; Blumen et al., 2001); (Blumen et al., 2001; Sun et al., 2012)~~, meaning a downward transport of turbulence (Mahrt and Vickers, 2002).

In order to illustrate an example of ~~Cat-~~category C turbulence intermittency, we select an event taking place between 0300 and 0400 UTC of ~~the~~ 26 of June of 2011, nIOP05. From Fig. 12a we can observe a progressive wind speed decrease in the higher levels of the Valimev tower between 0310 and 0350 UTC (see black rectangle in Fig. 12a), associated with an increase on the vertical wind speed variability at 60 m, which has the maximum between 0345 and 0355 UTC (Fig. 12b). This maximum ~~is intensified-~~increases with height and ~~its time delay as the levels are closer to the surface is due to its downward propagation nature~~propagates downward to lower levels with time. This downward turbulence transport is also ~~seen with the reflected in~~ negative  $S$  values, ~~show-~~shown in Fig. 13 for  $z_{8m}$  and  $z_{60m}$ . The period where the skewness is more negative agrees well with the period at which the larger oscillations of  $w$  take place (0350 UTC). All these characteristics could indicate a ~~category C~~ type of turbulence intermittency event ~~;-representing-occasional-mixing-found-within-the-weak-turbulence-corresponding-to~~ category C. The event exhibits occasional mixing and a downward transport of turbulence (Mahrt and Vickers, 2002), both

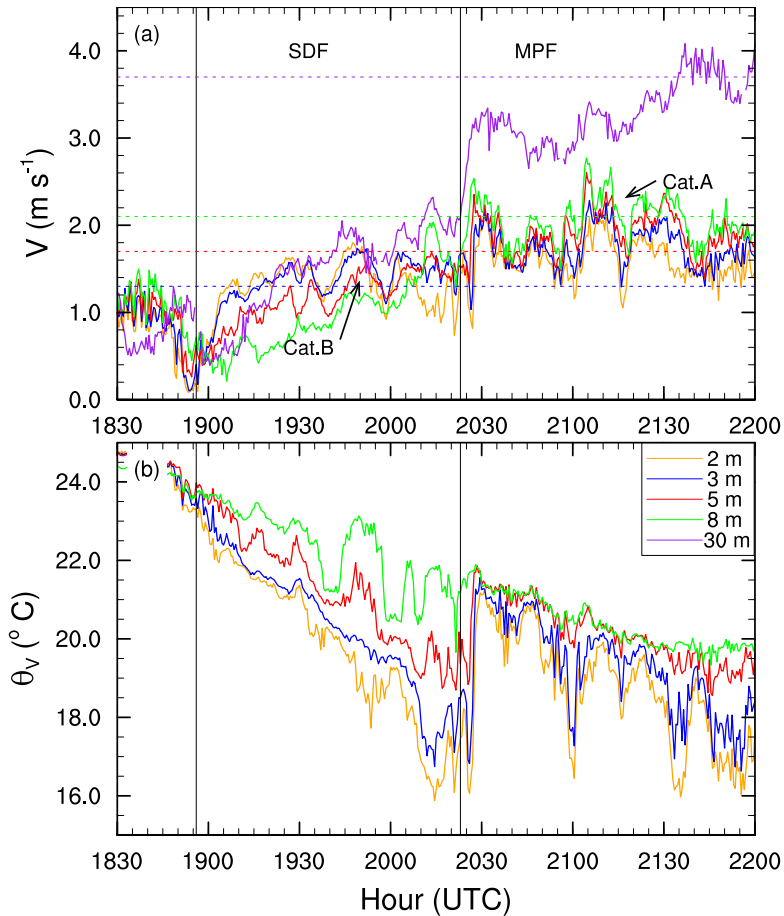

**Figure 11.** Time series of (a) horizontal wind speed and (b) virtual potential temperature for the 2 of July (nIOP09) during the BLLAST field experiment for  $z_{2m}$ ,  $z_{3m}$ ,  $z_{5m}$ ,  $z_{8m}$  and  $z_{30m}$ . The shallow drainage flow (SDF) stage is indicated between 1855 and 2020 UTC, and a consecutive mountain-plain ~~wave-flow~~ (MPF) stage thereafter. ~~Both stages originated transitions between~~ In the SDF stage there are oscillations within regime 1 to regime 2 (which is category A)B, and enhancement of turbulence within ~~whereas in MPF stage there are transitions between~~ regime 1 ~~(category B)-~~ and regime 2. The potential temperature is not represented for  $z_{30m}$  because there ~~is only~~ are thermocouple measurements only for the Skinflo mast ( $z_{2m}$ - $z_{8m}$ ). The wind speed threshold for several levels are marked with the dashed line to better illustrate the transitions, whilst some transitions between regime 1 and regime 2 are marked with an arrow. The data shown herein is the 30 s temporal average from sonic anemometers with a frequency of 10 Hz.

~~signals of~~ suggesting a possible top-down turbulence event. It is relevant to note that this event is not strong enough to arrive to the ~~lower-lowest~~ levels of the Skinflo mast.



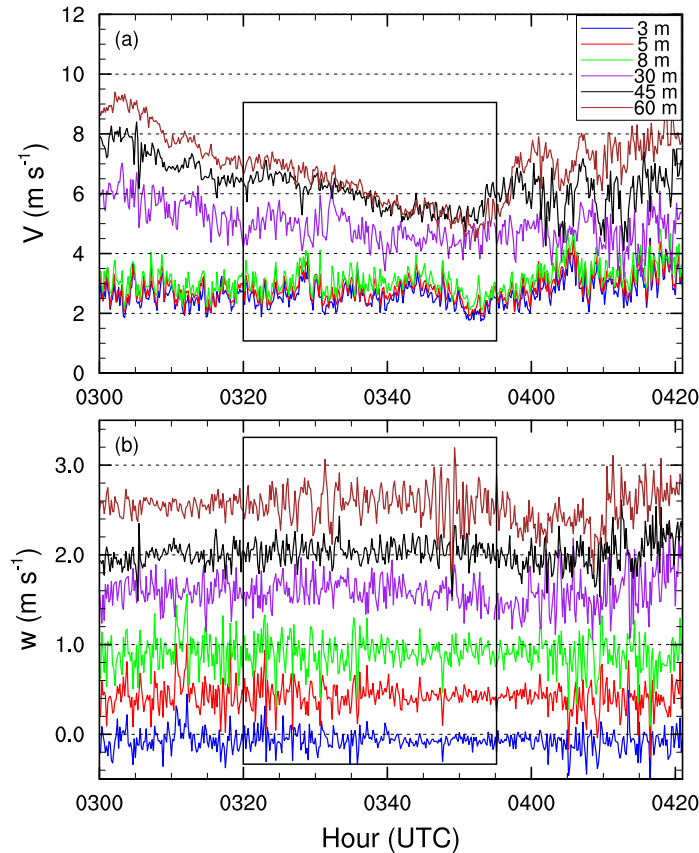

**Figure 12.** Times series of (a) horizontal wind speed  $V$  and (b) vertical wind speed,  $w$  (incremented  $0.5 \text{ m s}^{-1}$  for an easy comparison) for 26 June 2011 at  $z_{3m}$ ,  $z_{5m}$ ,  $z_{8m}$ ,  $z_{30m}$ ,  $z_{45m}$  and  $z_{60m}$ . The black rectangle localises marks the top-down event. The data shown herein is the 10 s temporal average from sonic anemometers with a frequency of 10 Hz.

~~Cat. Category~~ C turbulence intermittency does not occur as often as ~~Cat. A and Cat. category A and category B~~, as the number of points within regime 3 in Figs. A1, 8, and 9 shows. These points could sometimes correspond to a top-down event, but not always, since the regime 3 can be achieved through accelerations and sharp wind direction shifts (Mahrt et al., 2013).

## 7 Conclusions

- In this study we have analysed the HOST theory proposed by Sun et al. (2012) using the nocturnal data set of the BLLAST campaign, that took place at the “Plateau de Lannemezan”, an area located north of the central French Pyrenees. The main objective has been to explore the influence of the orography and the weather conditions during the BLLAST campaign in the HOST pattern that was originally defined for a relatively flat area and for fair weather conditions, the predominant conditions

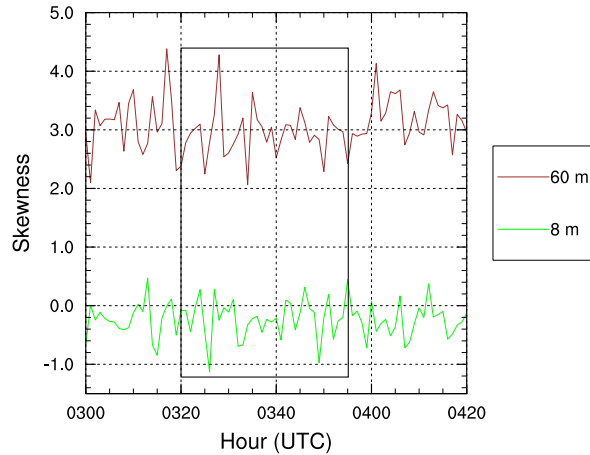

**Figure 13.** Time evolution of skewness of vertical wind component measured between 0300 and 0400 UTC on 26 of June during the BLLAST field experiment for the levels  $z_{3m}$  and  $z_{60m}$ . For the sake of clarity, the 60 m level skewness measurements are increased by  $3 \text{ m s}^{-1}$ . The black rectangle localises the top-down event. The data shown herein is the 1 min temporal average from sonic anemometers with a frequency of 10 Hz.

of the CASES-99 field campaign. [Therefore Here](#), the analysis has been done separating nights into two types: nocturnal IOPs (nIOPs) and the whole nocturnal dataset.

For the nIOPs of the BLLAST campaign the HOST theory is found to be valid and the turbulence relationships show the different turbulence regimes with a wind speed threshold for each height which locates the transition between the weak wind and weak turbulence intensity generated by local shear, regime 1, and the strong turbulence intensity generated by bulk shear, regime 2. This wind speed thresholds are lower than in Sun et al. (2012) so the bulk shear needed to achieve regime 2 is lower as well, due to the [larger-greater](#) roughness length of the mountainous terrain linked with the incoming southern flow. Similar results were found by Mahrt et al. (2013) and Bonin et al. (2015) for other locations. These nights are characterised by clear skies and intense radiative cooling where the predominant flow comes from the [southeast-south-east](#) quadrant corresponding to the arrival of shallow drainage flows to the lower levels and mountain plain flows later on. These flow circulations generated by the orography lead to turbulence enhancement and transitions between regimes, modifying the ideal HOST pattern.

Instead, when the turbulence relationship is analysed for the whole night dataset, results are significantly different, and they become wind direction dependent. The HOST pattern is observed for thermally driven flows, from wind directions between  $45^\circ$  and  $235^\circ$  (SE's) but it cannot be appreciated for winds coming for the other directions (NW's). For the NW's flows, the turbulence relationship is almost linear and independent of the vertical temperature gradients. Indeed, when considering the whole [night-time](#) dataset the frequency of winds coming from westerly and northerly directions increases representing the [mesoscale-and](#)-synoptic scale meteorological situations, in which the HOST pattern is erased mainly because the stable boundary layer cannot be developed.

To further investigate the turbulence relationship, we used box plots to provide additional information ~~about the turbulence relationships~~. Comparing the nIOPs and the SE's flows from the whole nocturnal dataset there are interesting differences: (i) the turbulence intensity tends to increase when we use the whole nocturnal SE's dataset; (ii) the number of outliers increases for the whole nocturnal SE's dataset, and therefore the number of turbulent events associated ~~to~~ with transitions between regimes 1, 2 and 3. Several ~~of the~~ points falling in regime 3 are actually associated with sudden wind speed and wind directional shear transitions, reflecting the non-stationary nature of regime 3.

In addition, when HOST is achieved, near neutral stratification is tied to regime 2, where turbulence is driven by bulk shear. Instead, when  $V < V_T$  stable stratification dominates, although negative potential temperature differences are present when intermittent turbulence events occur.

Finally, the different transitions between the ~~defined HOST regimes~~, HOST regimes related to turbulence intermittency (categories A, B and C) are illustrated for some nIOPs using appropriate examples (~~sect. 6~~). Results show that the presence of gravity waves associated ~~to~~ with shallow drainage flows and mountain plain flows create intermittent turbulence that can lead to a transition between regime 1 and regime 2, an example of category A. ~~When Local shear can be generated by internal gravity waves of relatively small wind speed amplitude so that the wind speed is below the threshold velocity. i.e. a category B transition, local shear can be generated by internal~~ lower than the threshold value. As a result, there is an increase of turbulence within regime 1 (Sun et al., 2012), which is the category B turbulence transition. Mahrt (2010) found that with very weak winds and strong stratification (regime 1), turbulence can appear under the presence of gravity waves. These oscillations are typically originated within the shallow drainage flow (~~Fig. 11~~). Category C may also appear when turbulence created by wind speed or directional shear is diffused downward, toward a stable environment, ~~as shown in Fig. 12 and Fig. 13~~.

Present and future work related to the knowledge of the flow circulation in BLLAST site would help to the full understanding of the ~~obtained results in this study~~ results obtained herein. In addition, a deeper and longer-term study of the HOST theory in other locations, considering mountain influenced sites and complex terrain areas would be desirable so that our outcomes could be generalised.

## **Appendix A: Box plot analysis during nIOPs**

This appendix is devoted to complement Sect. 3 showing the relationship between the  $V_{TKE}$  and  $V$  for the nIOP cases using box plot analysis (Fig. A1). It can be seen clearly how the results obtained herein display the same HOST theory as in Sun et al. (2012) for the CASES-99 field campaign.

*Author contributions.* Marie Lothon supplied the access to all the data set, as well as first hand insight to the BLLAST site and its phenomena. Erik Nilsson did some data treatment for the Skinflo mast and useful and precise advice on conceptual matters. Jielun Sun provided very helpful information on the HOST theory and ideas for improvement on the initial idea. Joan Bech, altogether with everyone provided help on the manuscript structure and general advice on turbulence. Maria Rosa Soler and Mireia Udina played a crucial part in the processes of

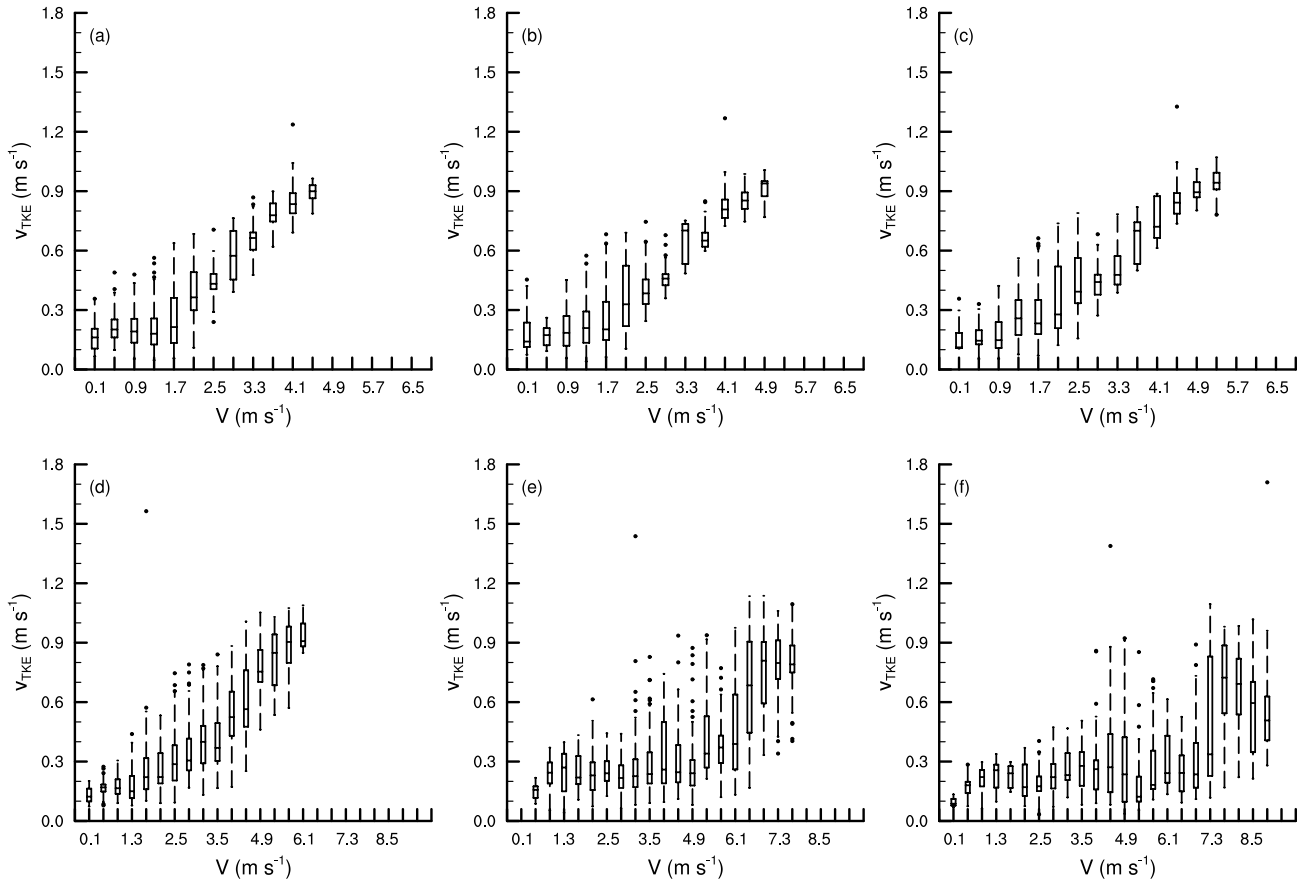

**Figure A1.** Box plots of the relationship between the bin-averaged turbulence strength  $V_{TKE}$  and the wind speed  $V$  for the nIOPs of the BLLAST field campaign. The maximum whisker length is proportional to 1.5 times the third and first quartile difference, or inter-quartile range ( $1.5 \cdot IQR$ ). Data correspond to the Skinflow mast and to the Valimev tower at different heights, (a)  $z_{3m}$ , (b)  $z_{5m}$  and (c)  $z_{8m}$  Skinflow mast levels, and (d)  $z_{30m}$ , (e)  $z_{45m}$  and (f)  $z_{60m}$  Valimev tower levels.

crafting this manuscript from scratch with Jesús Yus-Díez, developing the data process, the analysis of the results, and summarizing and expressing it in this article.

*Competing interests.* No competing interests are present

*Acknowledgements.* The work was supported by the Spanish Government through projects CGL2015-65627-C3-2-R and MINECO CGL2016-81828-REDT. We would also like to acknowledge for the BLLAST data policy. The BLLAST field experiment was made possible thanks

to the contribution of several institutions and supports: INSU-CNRS (Institut National des Sciences de l'Univers, Centre national de la Recherche Scientifique, LEFE-IDAO program), Météo-France, Observatoire Midi-Pyrénées (University of Toulouse), EUFAR (European Facility for Airborne Research) and COST ES0802 (European Cooperation in the field of Scientific and Technical). The field experiment would not have occurred without the contribution of all participating European and American research groups, which all have contributed in a significant amount (see supports). BLLAST field experiment was hosted by the instrumented site of Centre de Recherches Atmosphériques, Lannemezan, France (Observatoire Midi-Pyrénées, Laboratoire d'Aérodynamique). Its 60 m ("Valimev") tower was partly supported by the POCTEFA/FLUXPYR European program. BLLAST data are managed by SEDOO, from the Observatoire Midi-Pyrénées. As well as for the ~~responsibles-of~~responsibles for the instruments and data that we have used: Fabienne Lohou, PI of surface measurements in BLLAST, Frédérique Saïd, Solène Derrien for the 60 m instrumentation and data, Eric Pardyjak and Daniel Alexander for the 8 m ("Skinflow") tower.

10 Also to the P2OA instrumented site, since the Centre de Recherches Atmosphériques of Lannemezan is part of an instrumented platform called Pyrenean Platform of the Observation of the Atmosphere (<http://p2oa.aero.obs-mip.fr>). P2OA facilities and staff are funded and supported by the Observatoire ~~Midi-Midi-Pyrénées~~Midi-Pyrénées (University of Toulouse, France) and CNRS (Centre National de la Recherche Scientifique).

## References

- Acevedo, O. C., Mahrt, L., Puhales, F. S., Costa, F. D., Medeiros, L. E., and Degrazia, G. A.: Contrasting structures between the decoupled and coupled states of the stable boundary layer, *Quarterly Journal of the Royal Meteorological Society*, 142, 693–702, 2016.
- Andreae, M., Acevedo, O., Araújo, A., Artaxo, P., Barbosa, C., Barbosa, H., Brito, J., Carbone, S., Chi, X., Cintra, B., et al.: The amazon tall tower observatory (ATTO) in the remote Amazon basin: overview of first results from ecosystem ecology, meteorology, trace gas, and aerosol measurements., *Atmospheric Chemistry & Physics Discussions*, 15, 2015.
- Barneoud, P., Beck, S., Lafrique, P., and Lagnoux, B.: *Climatologie sur le site instrumenté du Laboratoire d’Aérodologie*, 2010.
- Blay-Carreras, E., Pardyjak, E., Pino, D., Alexander, D., Lohou, F., and Lothon, M.: Countergradient heat flux observations during the evening transition period, *Atmospheric Chemistry and Physics*, 14, 9077–9085, 2014.
- 10 Blumen, W. ., Banta, R., Burns, S., Fritts, D., Newson, R., Poulos, G., and Sun, J.: Turbulence statistics of a Kelvin-Helmholtz billow event observed in the night-time boundary layer during the Cooperative Atmosphere-Surface Exchange Study field program, *Dynamic of Atmospheres and Oceans*, 34, 189–204, 2001.
- Bonin, T. A., Blumberg, W. G., Klein, P. M., and Chilson, P. B.: Thermodynamic and turbulence characteristics of the southern great plains nocturnal boundary layer under differing turbulent regimes, *Boundary-layer meteorology*, 157, 401–420, 2015.
- 15 Cuxart, J. and Jiménez, M.: Mixing processes in a nocturnal low-level jet: An LES study, *Journal of the atmospheric sciences*, 64, 1666–1679, 2007.
- De Coster, O., Pietersen, H. P., Lohou, F., Hartogensis, O., and Moene, A.: BLLAST-uniform processing of Eddy-Covariance data, Internship Report Meteorology and Climatology, Wageningen University and Research Center, 990, 2011.
- Ferreres, E., Soler, M., and Terradellas, E.: Analysis of turbulent exchange and coherent structures in the stable atmospheric boundary layer based on tower observations, *Dynamics of atmospheres and oceans*, 64, 62–78, 2013.
- 20 Jimenez, M. and Cuxart, J.: A study on the nocturnal flows generated in the north side of the Pyrenees, *Atmospheric Research*, 145-146, 244–254, 2014.
- Jiménez, M. A., Cuxart, J., and Martínez-Villagrana, D.: Influence of a valley exit jet on the nocturnal atmospheric boundary layer at the foothills of the Pyrenees, *Quarterly Journal of the Royal Meteorological Society*, 145, 356–375, 2019.
- 25 Lin, J.-T. and Pao, Y.-H.: Wakes in stratified fluids, *Annual Review of Fluid Mechanics*, 11, 317–338, 1979.
- Lothon, M., Lohou, F., Pino, D., Couvreux, F., Pardyjak, E., Reuder, J., Vilà-Guerau De Arellano, J., Durand, P., Hartogensis, O., Legain, D., et al.: The BLLAST field experiment: boundary-layer late afternoon and sunset turbulence, *Atmospheric chemistry and physics*, 14, 10931–10960, 2014.
- Mahrt, L.: Stratified atmospheric boundary layers, *Boundary-Layer Meteorology*, 90, 375–396, 1999.
- 30 Mahrt, L.: Computing turbulent fluxes near the surface: Needed improvements, *Agricultural and forest meteorology*, 150, 501–509, 2010.
- Mahrt, L.: Stably stratified atmospheric boundary layers, *Annual review of fluid mechanics*, 46, 23–45, 2014.
- Mahrt, L.: Stably stratified flow in a shallow valley, *Boundary-layer meteorology*, 162, 1–20, 2017.
- Mahrt, L. and Vickers, D.: Contrasting vertical structures of nocturnal boundary layers, *Boundary-Layer Meteorology*, 105, 351–363, 2002.
- Mahrt, L., Thomas, C., Richardson, S., Seaman, N., Stauffer, D., and Zeeman, M.: Non-stationary generation of weak turbulence for very stable and weak-wind conditions, *Boundary-Layer Meteorology*, 147, 179–199, 2013.
- 35 Nauta, L.: Shallow drainage flows over light sloping terrain during BLLAST 2011: Two case studies, Master’s thesis, Meteorology and air quality group at the Wageningen University, supervised by Dr.Ir. Oscar Hartogensis, 2013.

- Newsom, R. K. and Banta, R. M.: Shear-flow instability in the stable nocturnal boundary layer as observed by Doppler lidar during CASES-99, *Journal of the atmospheric sciences*, 60, 16–33, 2003.
- Nilsson, E., Lohou, F., Lothon, M., Pardyjak, E., Mahrt, L., and Darbieu, C.: Turbulence kinetic energy budget during the afternoon transition—Part 1: Observed surface TKE budget and boundary layer description for 10 intensive observation period days, *Atmospheric Chemistry and Physics*, 16, 8849–8872, 2016.
- 5 Poulos, G. S., Blumen, W., Fritts, D. C., Lundquist, J. K., Sun, J., Burns, S. P., Nappo, C., Banta, R., Newsom, R., Cuxart, J., et al.: CASES-99: A comprehensive investigation of the stable nocturnal boundary layer, *Bulletin of the American Meteorological Society*, 83, 555–581, 2002.
- Román-Cascón, C., Yagüe, C., Arrillaga, J., Lothon, M., Pardyjak, E., Lohou, F., Inclán, R., Sastre, M., Maqueda, G., Derrien, S., et al.: Comparing mountain breezes and their impacts on CO<sub>2</sub> mixing ratios at three contrasting areas, *Atmospheric Research*, 221, 111–126, 2019.
- 10 Román-Cascón, C., Yagüe, C., Mahrt, L., Sastre, M., Steeneveld, G.-J., Pardyjak, E., van de Boer, A., and Hartogenesis, O.: Interactions among drainage flows, gravity waves and turbulence: a BLLAST case study, *Atmospheric Chemistry and Physics*, 14, 9031–9047, 2015.
- Said, F., Derrien, S., Pique, E., Abadie, M., Meyerfeld, Y., Jarnot, C., Martin, J., Bezombes, Y., Lohou, F., Lothon, M., Rechal, R., and Bargain, E.: POCTEFA/FluxPyr and BLLAST Campistrous mast June 2011, [http://bllast.sedoo.fr/database/source/displayDataCorps.php?pi=Fabienne.Lohou@aero.obs-mip.fr&rep=../data/FREE/Ground\\_Station/60\\_m\\_Tower/fiches\\_Meteorologicalparameters/](http://bllast.sedoo.fr/database/source/displayDataCorps.php?pi=Fabienne.Lohou@aero.obs-mip.fr&rep=../data/FREE/Ground_Station/60_m_Tower/fiches_Meteorologicalparameters/), 2011a.
- 15 Said, F., Derrien, S., Pique, E., Abadie, M., Meyerfeld, Y., Jarnot, C., Martin, J., Bezombes, Y., Lohou, F., Lothon, M., Rechal, R., and Bargain, E.: POCTEFA/FluxPyr and BLLAST Campistrous mast July 2011, [http://bllast.sedoo.fr/database/source/displayDataCorps.php?pi=Fabienne.Lohou@aero.obs-mip.fr&rep=../data/FREE/Ground\\_Station/60\\_m\\_Tower/fiches\\_Meteorologicalparameters/](http://bllast.sedoo.fr/database/source/displayDataCorps.php?pi=Fabienne.Lohou@aero.obs-mip.fr&rep=../data/FREE/Ground_Station/60_m_Tower/fiches_Meteorologicalparameters/), 2011b.
- 20 Soler, M., Infante, C., Buenestado, P., and Mahrt, L.: Observations of nocturnal drainage flow in a shallow gully, *Boundary-Layer Meteorology*, 105, 253–273, 2002.
- Soler, M., Udina, M., and Ferreres, E.: Observational and numerical simulation study of a sequence of eight atmospheric density currents in northern Spain, *Boundary-layer meteorology*, 153, 195–216, 2014.
- Sun, J.: Vertical variations of mixing lengths under neutral and stable conditions during CASES-99, *Journal of Applied Meteorology and Climatology*, 50, 2030–2041, 2011.
- 25 Sun, J., Burns, S. P., Lenschow, D. H., Banta, R., Newsom, R., Coulter, R., Frasier, S., Ince, T., Nappo, C., Cuxart, J., et al.: Intermittent turbulence associated with a density current passage in the stable boundary layer, *Boundary-Layer Meteorology*, 105, 199–219, 2002.
- Sun, J., Lenschow, D. H., Burns, S. P., Banta, R. M., Newsom, R. K., Coulter, R., Frasier, S., Ince, T., Nappo, C., Balsley, B. B., et al.: Atmospheric disturbances that generate intermittent turbulence in nocturnal boundary layers, *Boundary-Layer Meteorol*, 110, 255–279, 2004.
- 30 Sun, J., Mahrt, L., Banta, R., and Pichugina, Y. L.: Turbulence regimes and turbulence intermittency in the stable boundary layer during CASES99, *Journal of the Atmospheric Sciences*, pp. 338–351, 2012.
- Sun, J., Lenschow, D. H., LeMone, M. A., and Mahrt, L.: The role of large-coherent-eddy transport in the atmospheric surface layer based on CASES-99 observations, *Boundary-layer meteorology*, 160, 83–111, 2016.
- 35 Terradellas, E., Soler, M., Ferreres, E., and Bravo, M.: Analysis of oscillations in the stable atmospheric boundary layer using wavelet methods, *Boundary-layer meteorology*, 114, 489–518, 2005.
- Udina, M., Soler, M., Viana, S., and Yagüe, C.: Model simulation of gravity waves triggered by a density current, *Quarterly Journal of the Royal Meteorological Society*, 139, 701–714, 2013.

- Udina, M., Sun, J., Kosović, B., and Soler, M. R.: Exploring vertical turbulence structure in neutrally and stably stratified flows using the weather research and forecasting–large-eddy simulation (WRF–LES) model, *Boundary-layer meteorology*, 161, 355–374, 2016.
- Viana, S., Terradellas, E., and Yagüe, C.: Analysis of gravity waves generated at the top of a drainage flow, *Journal of the Atmospheric Sciences*, 67, 3949–3966, 2010.
- 5 Wyngaard, J. C.: *Turbulence in the Atmosphere*, Cambridge University Press, Cambridge, UK, 393 pp, 2010.
- Zilitinkevich, S., Elperin, T., Kleerorin, N., and Rogachevskii, I.: Energy-and flux-budget (EFB) turbulence closure model for stably stratified flows. Part I: steady-state, homogeneous regimes, pp. 11–35, 2007.
